# Supplementary material
Source: PubMed Central journal article supplement (PMC3243595)
Supplement: emboj2011331s2.pdf [file emboj2011331s2.pdf]

**Frankel et al. Supplementary Table I**

| Probe        | log2FC    | Fold Change | PValue      | PValue.adj  | 6mer | 7mer-A1 | 7mer-m8 | 8mer | Symbol   |
|--------------|-----------|-------------|-------------|-------------|------|---------|---------|------|----------|
| 217769_s_at  | -1,07495  | 2,11        | 1,71233E-16 | 2,60326E-12 | 1    | 1       | 0       | 1    | POMP     |
| 202194_at    | -1,04526  | 2,06        | 7,49739E-16 | 5,69914E-12 | 1    | 1       | 0       | 1    | TMED5    |
| 225911_at    | -0,973919 | 1,96        | 1,56832E-14 | 5,19715E-11 | 0    | 0       | 0       | 1    | NPNT     |
| 200783_s_at  | -0,934224 | 1,91        | 1,70925E-14 | 5,19715E-11 | 0    | 0       | 0       | 1    | STMN1    |
| 224587_at    | -0,975794 | 1,97        | 1,15069E-14 | 5,19715E-11 | 1    | 1       | 2       | 0    | SUB1     |
| 201485_s_at  | -1,03587  | 2,05        | 1,21262E-13 | 3,07259E-10 | 0    | 0       | 0       | 1    | RCN2     |
| 225079_at    | -0,896354 | 1,86        | 1,58914E-13 | 3,11996E-10 | 0    | 0       | 0       | 1    | EMP2     |
| 209089_at    | -0,93522  | 1,91        | 1,64176E-13 | 3,11996E-10 | 0    | 0       | 1       | 1    | RAB5A    |
| 202487_s_at  | -0,955748 | 1,94        | 2,87528E-13 | 4,85699E-10 | 0    | 0       | 0       | 0    | H2AFV    |
| 218888_s_at  | -0,910813 | 1,88        | 3,22639E-13 | 4,90508E-10 | 2    | 2       | 0       | 0    | NETO2    |
| 202919_at    | -0,880446 | 1,84        | 1,01402E-12 | 1,40147E-09 | 3    | 0       | 0       | 2    | MOBKL3   |
| 202593_s_at  | -0,948157 | 1,93        | 1,34685E-12 | 1,57508E-09 | 0    | 0       | 0       | 1    | GDE1     |
| 203743_s_at  | -0,833346 | 1,78        | 1,33306E-12 | 1,57508E-09 | 0    | 0       | 0       | 1    | TDG      |
| 201899_s_at  | -0,785528 | 1,72        | 9,65223E-12 | 1,04816E-08 | 0    | 0       | 0       | 1    | UBE2A    |
| 231896_s_at  | -0,767165 | 1,7         | 1,77235E-11 | 1,79634E-08 | 0    | 0       | 0       | 1    | DENR     |
| 224748_at    | -0,757019 | 1,69        | 2,02812E-11 | 1,92709E-08 | 3    | 0       | 1       | 1    | WDR68    |
| 218595_s_at  | 0,781322  | 1,72        | 2,18855E-11 | 1,95721E-08 | 0    | 0       | 0       | 0    | HEATR1   |
| 212530_at    | -0,825079 | 1,77        | 2,55005E-11 | 2,04044E-08 | 0    | 1       | 0       | 2    | NEK7     |
| 208873_s_at  | -0,767116 | 1,7         | 2,49142E-11 | 2,04044E-08 | 4    | 0       | 0       | 0    | REEF5    |
| 225120_at    | -0,770609 | 1,71        | 3,39875E-11 | 2,58356E-08 | 0    | 0       | 0       | 2    | PURB     |
| 208683_at    | -0,736897 | 1,67        | 4,18694E-11 | 2,88536E-08 | 1    | 0       | 1       | 0    | CAPN2    |
| 203011_at    | -0,751695 | 1,68        | 4,36515E-11 | 2,88536E-08 | 0    | 2       | 1       | 0    | IMPA1    |
| 221810_at    | -0,764012 | 1,7         | 4,03703E-11 | 2,88536E-08 | 0    | 0       | 1       | 1    | RAB15    |
| 205239_at    | 0,738613  | 1,67        | 5,13305E-11 | 3,12151E-08 | 0    | 0       | 0       | 0    | AREG     |
| 218586_at    | -0,728787 | 1,66        | 5,05388E-11 | 3,12151E-08 | 0    | 0       | 0       | 1    | C20orf20 |
| 227094_at    | -0,729602 | 1,66        | 6,33325E-11 | 3,70325E-08 | 1    | 0       | 0       | 1    | DHTKD1   |
| 224911_s_at  | -0,720588 | 1,65        | 7,78008E-11 | 4,38076E-08 | 0    | 2       | 1       | 1    | DCBLD2   |
| 204831_at    | -0,719493 | 1,65        | 1,2845E-10  | 6,97438E-08 | 0    | 0       | 0       | 1    | CDK8     |
| 219806_s_at  | -0,699123 | 1,62        | 2,22991E-10 | 1,13004E-07 | 0    | 0       | 0       | 0    | C11orf75 |
| 203273_s_at  | -0,696284 | 1,62        | 2,19239E-10 | 1,13004E-07 | 0    | 0       | 1       | 0    | TUSC2    |
| 202092_s_at  | -0,736139 | 1,67        | 2,53651E-10 | 1,24248E-07 | 0    | 0       | 1       | 0    | ARL2BP   |
| 1556060_a_at | -0,708128 | 1,63        | 2,61522E-10 | 1,24248E-07 | 0    | 0       | 0       | 1    | ZNF451   |
| 208754_s_at  | -0,724675 | 1,65        | 3,06255E-10 | 1,41091E-07 | 2    | 0       | 1       | 0    | NAP1L1   |
| 222396_at    | -0,693274 | 1,62        | 3,69272E-10 | 1,65119E-07 | 0    | 0       | 1       | 0    | HN1      |
| 201322_at    | -0,696159 | 1,62        | 4,37781E-10 | 1,81078E-07 | 0    | 0       | 1       | 0    | ATP5B    |
| 212993_at    | -0,702537 | 1,63        | 4,40694E-10 | 1,81078E-07 | 1    | 0       | 0       | 0    | NACC2    |
| 202303_x_at  | -0,677228 | 1,6         | 4,33566E-10 | 1,81078E-07 | 0    | 0       | 0       | 1    | SMARCA5  |
| 225847_at    | -0,721331 | 1,65        | 5,03146E-10 | 2,01298E-07 | 0    | 0       | 1       | 0    | AADACL1  |
| 213029_at    | -0,663789 | 1,58        | 8,69368E-10 | 3,38898E-07 | 2    | 1       | 2       | 0    | NFIB     |
| 227373_at    | -0,736309 | 1,67        | 1,00622E-09 | 3,8244E-07  | 0    | 0       | 0       | 0    | KIAA0174 |
| 225783_at    | -0,653758 | 1,57        | 1,3559E-09  | 5,02773E-07 | 0    | 0       | 0       | 1    | UBE2F    |
| 217833_at    | -0,65702  | 1,58        | 1,40636E-09 | 5,09068E-07 | 2    | 1       | 1       | 1    | SYNCRIP  |
| 225768_at    | -0,655549 | 1,58        | 1,48794E-09 | 5,26072E-07 | 2    | 1       | 0       | 1    | NR1D2    |
| 203211_s_at  | -0,670554 | 1,59        | 1,9731E-09  | 6,81751E-07 | 0    | 0       | 1       | 1    | MTMR2    |
| 200746_s_at  | -0,649606 | 1,57        | 2,30202E-09 | 7,77725E-07 | 0    | 0       | 1       | 0    | GNB1     |
| 225182_at    | -0,64574  | 1,56        | 3,02322E-09 | 9,99174E-07 | 0    | 1       | 0       | 1    | TMEM50B  |
| 208640_at    | -0,613244 | 1,53        | 4,10818E-09 | 1,32886E-06 | 0    | 0       | 0       | 1    | RAC1     |
| 211764_s_at  | -0,672846 | 1,59        | 4,45693E-09 | 1,41164E-06 | 1    | 3       | 0       | 1    | UBE2D1   |
| 225645_at    | -0,60702  | 1,52        | 5,13671E-09 | 1,58696E-06 | 1    | 0       | 0       | 0    | EHF      |
| 200798_x_at  | -0,61709  | 1,53        | 5,21924E-09 | 1,58696E-06 | 1    | 2       | 0       | 1    | MCL1     |
| 202583_s_at  | -0,652127 | 1,57        | 6,21387E-09 | 1,81672E-06 | 0    | 0       | 0       | 1    | RANBP9   |
| 212956_at    | -0,615217 | 1,53        | 6,11523E-09 | 1,81672E-06 | 1    | 0       | 1       | 0    | TBC1D9   |
| 226302_at    | 0,638207  | 1,56        | 7,73957E-09 | 2,10115E-06 | 1    | 0       | 0       | 0    | ATP8B1   |
| 212322_at    | -0,622021 | 1,54        | 7,61363E-09 | 2,10115E-06 | 1    | 1       | 1       | 0    | SGPL1    |
| 202936_s_at  | -0,605681 | 1,52        | 7,38221E-09 | 2,10115E-06 | 0    | 0       | 1       | 0    | SOX9     |
| 230746_s_at  | -0,862687 | 1,82        | 7,62529E-09 | 2,10115E-06 | 0    | 0       | 1       | 2    | STC1     |
| 215171_s_at  | -0,602104 | 1,52        | 8,11378E-09 | 2,1641E-06  | 0    | 0       | 1       | 1    | TIMM17A  |
| 208841_s_at  | -0,604378 | 1,52        | 8,57676E-09 | 2,24815E-06 | 2    | 1       | 1       | 0    | G3BP2    |
| 203987_at    | -0,629162 | 1,55        | 8,84818E-09 | 2,27998E-06 | 1    | 1       | 0       | 1    | FZD6     |
| 217890_s_at  | -0,607483 | 1,52        | 9,53505E-09 | 2,41602E-06 | 0    | 2       | 3       | 0    | PARVA    |
| 224793_s_at  | -0,607829 | 1,52        | 1,09669E-08 | 2,73328E-06 | 1    | 0       | 1       | 1    | TGFBFR1  |
| 227947_at    | -0,683299 | 1,61        | 1,35429E-08 | 3,32084E-06 | 4    | 2       | 0       | 1    | PHACTR2  |
| 204039_at    | -0,5913   | 1,51        | 1,40203E-08 | 3,38333E-06 | 0    | 0       | 0       | 1    | CEBPA    |
| 217800_s_at  | -0,623168 | 1,54        | 1,44064E-08 | 3,4222E-06  | 0    | 2       | 1       | 0    | NDFIP1   |
| 218065_s_at  | -0,592001 | 1,51        | 1,52216E-08 | 3,56021E-06 | 0    | 0       | 1       | 0    | TMEM9B   |
| 224621_at    | -0,597977 | 1,51        | 1,66593E-08 | 3,83745E-06 | 2    | 2       | 3       | 0    | MAPK1    |
| 208861_s_at  | -0,598007 | 1,51        | 1,81376E-08 | 4,08149E-06 | 1    | 0       | 0       | 1    | ATRX     |

|              |           |      |             |             |   |   |   |             |
|--------------|-----------|------|-------------|-------------|---|---|---|-------------|
| 200617_at    | -0,595755 | 1,51 | 1,82557E-08 | 4,08149E-06 | 0 | 0 | 0 | 2 MLEC      |
| 209572_s_at  | -0,596277 | 1,51 | 2,09312E-08 | 4,61184E-06 | 1 | 0 | 1 | 0 EED       |
| 226871_s_at  | -0,578698 | 1,49 | 2,12373E-08 | 4,61244E-06 | 0 | 0 | 0 | 1 ATG4D     |
| 202284_s_at  | -0,572567 | 1,49 | 2,63126E-08 | 5,63423E-06 | 0 | 0 | 1 | 0 CDKN1A    |
| 222212_s_at  | -0,570756 | 1,49 | 2,90182E-08 | 6,12727E-06 | 0 | 0 | 1 | 0 LASS2     |
| 203358_s_at  | -0,588337 | 1,5  | 3,01165E-08 | 6,27207E-06 | 0 | 0 | 1 | 1 EZH2      |
| 217941_s_at  | -0,601988 | 1,52 | 3,33513E-08 | 6,85189E-06 | 0 | 2 | 0 | 1 ERBB2IP   |
| 225313_at    | -0,577067 | 1,49 | 3,42644E-08 | 6,91561E-06 | 1 | 1 | 0 | 0 C20orf177 |
| 225143_at    | -0,586898 | 1,5  | 3,45712E-08 | 6,91561E-06 | 1 | 0 | 0 | 0 SFXN4     |
| 202442_at    | -0,619695 | 1,54 | 3,66293E-08 | 7,18509E-06 | 0 | 0 | 0 | 1 AP3S1     |
| 224893_at    | -0,585328 | 1,5  | 3,68636E-08 | 7,18509E-06 | 0 | 0 | 0 | 0 ATL3      |
| 200829_x_at  | -0,573217 | 1,49 | 3,7897E-08  | 7,29302E-06 | 0 | 1 | 1 | 0 ZNF207    |
| 217028_at    | 0,56992   | 1,48 | 3,9681E-08  | 7,54088E-06 | 0 | 0 | 0 | 0 CXCR4     |
| 201376_s_at  | -0,593154 | 1,51 | 4,29503E-08 | 8,0614E-06  | 0 | 1 | 1 | 0 HNRNPF    |
| 226464_at    | -0,57414  | 1,49 | 4,49289E-08 | 8,32993E-06 | 4 | 1 | 0 | 1 C3orf58   |
| 224959_at    | -0,601401 | 1,52 | 4,55663E-08 | 8,34632E-06 | 0 | 1 | 0 | 1 SLC26A2   |
| 212440_at    | -0,567101 | 1,48 | 4,76009E-08 | 8,61519E-06 | 0 | 0 | 1 | 0 SNRNP27   |
| 200667_at    | -0,560404 | 1,47 | 5,37642E-08 | 9,6162E-06  | 2 | 0 | 1 | 0 UBE2D3    |
| 202330_s_at  | -0,56735  | 1,48 | 5,44489E-08 | 9,62542E-06 | 0 | 0 | 1 | 0 UNG       |
| 226092_at    | -0,549897 | 1,46 | 6,05064E-08 | 1,04955E-05 | 1 | 1 | 1 | 1 MPP5      |
| 218605_at    | -0,559292 | 1,47 | 6,07513E-08 | 1,04955E-05 | 0 | 0 | 1 | 1 TFB2M     |
| 219628_at    | -0,562196 | 1,48 | 6,31103E-08 | 1,07805E-05 | 0 | 0 | 2 | 0 ZMAT3     |
| 225436_at    | -0,564579 | 1,48 | 6,70891E-08 | 1,12083E-05 | 1 | 0 | 1 | 2 FAM108C1  |
| 207785_s_at  | -0,561408 | 1,48 | 6,68911E-08 | 1,12083E-05 | 0 | 0 | 0 | 0 RBPJ      |
| 201889_at    | -0,596783 | 1,51 | 6,87319E-08 | 0,000011358 | 0 | 0 | 1 | 0 FAM3C     |
| 224872_at    | -0,544238 | 1,46 | 7,09956E-08 | 1,16059E-05 | 0 | 0 | 1 | 1 DIP2B     |
| 225813_at    | -0,572629 | 1,49 | 7,39188E-08 | 1,18293E-05 | 0 | 0 | 0 | 0 RC3H2     |
| 202811_at    | -0,548656 | 1,46 | 7,33398E-08 | 1,18293E-05 | 0 | 0 | 0 | 1 STAMPB    |
| 225702_at    | -0,556313 | 1,47 | 7,58914E-08 | 1,20185E-05 | 0 | 0 | 0 | 1 C8orf76   |
| 210337_s_at  | -0,642395 | 1,56 | 8,07246E-08 | 1,26521E-05 | 0 | 0 | 1 | 0 ACLY      |
| 201092_at    | -0,556032 | 1,47 | 8,20093E-08 | 1,27223E-05 | 0 | 0 | 0 | 1 RBBP7     |
| 213511_s_at  | -0,557486 | 1,47 | 9,11303E-08 | 1,39945E-05 | 1 | 0 | 0 | 0 MTMR1     |
| 202089_s_at  | -0,569898 | 1,48 | 1,04516E-07 | 1,58896E-05 | 0 | 0 | 0 | 1 SLC39A6   |
| 1554768_a_at | -0,668762 | 1,59 | 1,08442E-07 | 1,63233E-05 | 0 | 0 | 1 | 0 MAD2L1    |
| 210174_at    | 0,538365  | 1,45 | 1,11138E-07 | 0,000016565 | 1 | 3 | 0 | 0 NR5A2     |
| 225273_at    | -0,545185 | 1,46 | 1,19922E-07 | 1,77007E-05 | 0 | 0 | 1 | 0 WWC3      |
| 224740_at    | 0,552823  | 1,47 | 1,56367E-07 | 2,28581E-05 | 1 | 0 | 1 | 0 C5orf43   |
| 233177_s_at  | -0,543058 | 1,46 | 1,60025E-07 | 2,31701E-05 | 0 | 0 | 0 | 0 PNKD      |
| 223614_at    | 0,527515  | 1,44 | 1,66394E-07 | 0,000023865 | 1 | 0 | 0 | 0 MMP16     |
| 213154_s_at  | -0,543938 | 1,46 | 1,86365E-07 | 0,000026466 | 0 | 0 | 0 | 1 BICD2     |
| 207791_s_at  | -0,601371 | 1,52 | 1,88011E-07 | 0,000026466 | 0 | 0 | 0 | 1 RAB1A     |
| 227639_at    | -0,534568 | 1,45 | 1,95461E-07 | 2,72624E-05 | 2 | 0 | 1 | 0 PIGK      |
| 231849_at    | -0,524849 | 1,44 | 2,12449E-07 | 2,93623E-05 | 0 | 1 | 0 | 0 KRT80     |
| 218979_at    | -0,523296 | 1,44 | 2,28414E-07 | 3,12845E-05 | 0 | 0 | 1 | 0 RMI1      |
| 224791_at    | -0,534213 | 1,45 | 2,31807E-07 | 3,14657E-05 | 3 | 1 | 0 | 1 ASAP1     |
| 220147_s_at  | -0,513541 | 1,43 | 2,34705E-07 | 3,15771E-05 | 1 | 0 | 0 | 1 FAM60A    |
| 218170_at    | 0,600462  | 1,52 | 2,63688E-07 | 3,51654E-05 | 1 | 1 | 0 | 0 ISOC1     |
| 200833_s_at  | -0,520398 | 1,43 | 2,71596E-07 | 0,000035905 | 0 | 0 | 1 | 1 RAP1B     |
| 202165_at    | -0,521812 | 1,44 | 2,80378E-07 | 3,67464E-05 | 1 | 0 | 0 | 1 PPP1R2    |
| 228454_at    | -0,521996 | 1,44 | 3,17752E-07 | 4,09388E-05 | 1 | 2 | 0 | 1 LCOR      |
| 213503_x_at  | -0,523253 | 1,44 | 3,69204E-07 | 4,71681E-05 | 0 | 0 | 1 | 0 ANXA2     |
| 205417_s_at  | -0,52772  | 1,44 | 3,8515E-07  | 4,87953E-05 | 0 | 0 | 1 | 0 DAG1      |
| 223310_x_at  | -0,523148 | 1,44 | 4,07474E-07 | 5,11969E-05 | 1 | 0 | 1 | 0 PNPLA8    |
| 203276_at    | -0,543778 | 1,46 | 4,16892E-07 | 5,19509E-05 | 0 | 0 | 1 | 0 LMNB1     |
| 217892_s_at  | -0,503059 | 1,42 | 4,45867E-07 | 5,34835E-05 | 0 | 2 | 0 | 0 LIMA1     |
| 235004_at    | 0,539273  | 1,45 | 4,43473E-07 | 5,34835E-05 | 1 | 0 | 0 | 0 RBM24     |
| 226106_at    | -0,521963 | 1,44 | 4,44313E-07 | 5,34835E-05 | 4 | 3 | 0 | 0 RNF141    |
| 230069_at    | 0,519501  | 1,43 | 4,42131E-07 | 5,34835E-05 | 1 | 0 | 0 | 0 SFXN1     |
| 213272_s_at  | -0,544194 | 1,46 | 4,4678E-07  | 5,34835E-05 | 0 | 0 | 3 | 0 TMEM159   |
| 228135_at    | -0,50255  | 1,42 | 4,56486E-07 | 5,42184E-05 | 0 | 1 | 1 | 0 C1orf52   |
| 228257_at    | -0,504513 | 1,42 | 4,62381E-07 | 5,44928E-05 | 1 | 1 | 1 | 0 ANKRD52   |
| 223253_at    | -0,512417 | 1,43 | 4,8536E-07  | 0,000056761 | 2 | 0 | 1 | 0 EPDR1     |
| 213145_at    | -0,515942 | 1,43 | 5,74296E-07 | 6,61441E-05 | 0 | 0 | 0 | 0 FBXL14    |
| 212900_at    | 0,520609  | 1,43 | 6,39969E-07 | 7,31538E-05 | 1 | 1 | 0 | 0 SEC24A    |
| 227808_at    | -0,507773 | 1,42 | 6,51438E-07 | 7,39091E-05 | 1 | 0 | 0 | 1 DNAJC15   |
| 224743_at    | 0,498851  | 1,41 | 6,91491E-07 | 7,78721E-05 | 2 | 0 | 0 | 0 IMPAD1    |
| 201609_x_at  | -0,519323 | 1,43 | 7,25557E-07 | 8,05157E-05 | 0 | 0 | 1 | 1 ICMT      |
| 203026_at    | -0,504254 | 1,42 | 7,22073E-07 | 8,05157E-05 | 1 | 0 | 0 | 1 ZBTB5     |
| 229017_s_at  | -0,492263 | 1,41 | 7,81716E-07 | 0,000086119 | 2 | 0 | 0 | 1 DSTYK     |
| 212416_at    | -0,493104 | 1,41 | 9,58171E-07 | 0,000104799 | 2 | 1 | 0 | 0 SCAMP1    |

|             |           |      |             |             |   |   |   |             |
|-------------|-----------|------|-------------|-------------|---|---|---|-------------|
| 226039_at   | -0,485807 | 1,4  | 9,98754E-07 | 0,000108458 | 2 | 2 | 1 | 1 MGAT4A    |
| 218917_s_at | -0,509041 | 1,42 | 1,01047E-06 | 0,000108951 | 1 | 2 | 0 | 1 ARID1A    |
| 204082_at   | -0,491301 | 1,41 | 1,05068E-06 | 0,000112489 | 0 | 1 | 0 | 1 PBX3      |
| 225720_at   | 0,474319  | 1,39 | 1,15954E-06 | 0,000123276 | 4 | 0 | 0 | 0 SYNPO2    |
| 212560_at   | -0,513948 | 1,43 | 1,20743E-06 | 0,000127476 | 0 | 2 | 0 | 1 SORL1     |
| 219127_at   | -0,500523 | 1,41 | 1,2369E-06  | 0,000129687 | 0 | 0 | 0 | 0 ATAD4     |
| 220625_s_at | -0,479005 | 1,39 | 1,27225E-06 | 0,00013248  | 0 | 1 | 1 | 0 ELF5      |
| 200030_s_at | -0,502235 | 1,42 | 1,32911E-06 | 0,000137458 | 1 | 1 | 0 | 0 SLC25A3   |
| 202771_at   | -0,520592 | 1,43 | 1,34147E-06 | 0,0001378   | 0 | 0 | 0 | 1 FAM38A    |
| 206858_s_at | 0,484612  | 1,4  | 1,60532E-06 | 0,000163796 | 0 | 0 | 0 | 0 HOXC6     |
| 212534_at   | -0,482801 | 1,4  | 1,71577E-06 | 0,000173899 | 3 | 0 | 1 | 1 ZNF24     |
| 226276_at   | -0,479611 | 1,39 | 1,90678E-06 | 0,000191979 | 2 | 0 | 1 | 0 TMEM167A  |
| 205225_at   | 0,475087  | 1,39 | 2,04301E-06 | 0,000204341 | 0 | 0 | 0 | 0 ESR1      |
| 202946_s_at | -0,461052 | 1,38 | 2,06847E-06 | 0,000205536 | 1 | 0 | 0 | 1 BTBD3     |
| 203231_s_at | -0,497733 | 1,41 | 2,14606E-06 | 0,00021186  | 4 | 0 | 1 | 2 ATXN1     |
| 226247_at   | -0,478595 | 1,39 | 2,16628E-06 | 0,000212477 | 1 | 0 | 1 | 0 PLEKHA1   |
| 213304_at   | -0,460176 | 1,38 | 2,2363E-06  | 0,000214441 | 0 | 1 | 0 | 1 FAM179B   |
| 212070_at   | -0,464325 | 1,38 | 2,21715E-06 | 0,000214441 | 0 | 0 | 1 | 0 GPR56     |
| 218137_s_at | -0,473743 | 1,39 | 2,24273E-06 | 0,000214441 | 0 | 0 | 0 | 1 SMAP1     |
| 234672_s_at | -0,470736 | 1,39 | 2,20545E-06 | 0,000214441 | 0 | 0 | 0 | 0 TMEM48    |
| 202055_at   | -0,471504 | 1,39 | 2,35748E-06 | 0,000224005 | 2 | 1 | 2 | 0 KPN1      |
| 204573_at   | 0,454078  | 1,37 | 2,43777E-06 | 0,000230196 | 0 | 0 | 0 | 0 CROT      |
| 239443_at   | 0,4628    | 1,38 | 2,52773E-06 | 0,000237217 | 0 | 0 | 0 | 0 PCDHB6    |
| 202061_s_at | -0,457507 | 1,37 | 2,56647E-06 | 0,000239375 | 0 | 1 | 2 | 1 SEL1L     |
| 223066_at   | -0,496459 | 1,41 | 2,58487E-06 | 0,00023962  | 0 | 0 | 1 | 0 SNAPIN    |
| 208161_s_at | -0,458676 | 1,37 | 2,69793E-06 | 0,000248585 | 0 | 0 | 0 | 0 ABCC3     |
| 212820_at   | -0,456167 | 1,37 | 2,98574E-06 | 0,000273447 | 1 | 0 | 0 | 1 DMXL2     |
| 213746_s_at | -0,488217 | 1,4  | 3,17139E-06 | 0,000288711 | 0 | 0 | 0 | 0 FLNA      |
| 229128_s_at | 0,56164   | 1,48 | 3,24334E-06 | 0,000293503 | 1 | 1 | 0 | 0 ANP32E    |
| 224746_at   | -0,46234  | 1,38 | 3,41073E-06 | 0,000306824 | 1 | 1 | 0 | 0 KIAA1522  |
| 223391_at   | -0,469071 | 1,38 | 3,49332E-06 | 0,000312405 | 2 | 0 | 1 | 0 SGPP1     |
| 204433_s_at | -0,456399 | 1,37 | 3,54134E-06 | 0,000314848 | 0 | 1 | 1 | 0 SPATA2    |
| 208926_at   | -0,478977 | 1,39 | 3,7207E-06  | 0,000328871 | 1 | 0 | 0 | 0 NEU1      |
| 203100_s_at | -0,46497  | 1,38 | 3,77313E-06 | 0,000331578 | 0 | 0 | 0 | 2 CDYL      |
| 218866_s_at | -0,521819 | 1,44 | 3,98012E-06 | 0,00034577  | 0 | 0 | 1 | 0 POLR3K    |
| 226233_at   | -0,447875 | 1,36 | 4,2383E-06  | 0,000366107 | 0 | 0 | 0 | 1 B3GALNT2  |
| 225580_at   | 0,512287  | 1,43 | 4,26681E-06 | 0,000366488 | 0 | 0 | 0 | 0 MRPL50    |
| 208612_at   | -0,545323 | 1,46 | 4,29639E-06 | 0,000366955 | 0 | 0 | 0 | 0 PDIA3     |
| 225266_at   | -0,463521 | 1,38 | 4,71764E-06 | 0,000400683 | 2 | 1 | 0 | 1 ZNF652    |
| 203480_s_at | -0,454395 | 1,37 | 4,75868E-06 | 0,000401924 | 2 | 1 | 0 | 1 OTUD4     |
| 228324_at   | -0,489953 | 1,4  | 5,3246E-06  | 0,000447237 | 0 | 0 | 0 | 0 C9orf41   |
| 225912_at   | -0,449254 | 1,37 | 5,45535E-06 | 0,000455702 | 1 | 1 | 0 | 0 TP53INP1  |
| 211963_s_at | -0,469047 | 1,38 | 5,57582E-06 | 0,000455748 | 0 | 0 | 1 | 0 ARPC5     |
| 202969_at   | -0,443389 | 1,36 | 5,56879E-06 | 0,000455748 | 0 | 2 | 0 | 0 DYRK2     |
| 219429_at   | -0,438937 | 1,36 | 5,49848E-06 | 0,000455748 | 0 | 0 | 1 | 0 FA2H      |
| 227314_at   | -0,441637 | 1,36 | 5,54862E-06 | 0,000455748 | 1 | 1 | 1 | 1 ITGA2     |
| 218433_at   | -0,436828 | 1,35 | 5,72428E-06 | 0,000465381 | 1 | 0 | 0 | 1 PANK3     |
| 218020_s_at | -0,451476 | 1,37 | 6,15559E-06 | 0,000497784 | 0 | 0 | 0 | 1 ZFAND3    |
| 226479_at   | 0,439662  | 1,36 | 6,32483E-06 | 0,000508764 | 3 | 0 | 0 | 0 KBTBD6    |
| 219529_at   | -0,452371 | 1,37 | 6,85068E-06 | 0,000545607 | 0 | 0 | 0 | 0 CLIC3     |
| 224641_at   | -0,430684 | 1,35 | 6,85463E-06 | 0,000545607 | 0 | 1 | 1 | 0 FYT1D1    |
| 222393_s_at | 0,442371  | 1,36 | 6,94168E-06 | 0,000549658 | 2 | 0 | 0 | 0 NAT13     |
| 219062_s_at | -0,449576 | 1,37 | 7,28814E-06 | 0,000574102 | 0 | 0 | 0 | 1 ZCCHC2    |
| 209849_s_at | -0,432805 | 1,35 | 7,63116E-06 | 0,000598023 | 0 | 0 | 0 | 0 RAD51C    |
| 227247_at   | 0,436909  | 1,35 | 8,0471E-06  | 0,000627385 | 1 | 0 | 0 | 0 PLEKHA8   |
| 221543_s_at | -0,494451 | 1,41 | 8,23487E-06 | 0,000638749 | 2 | 0 | 1 | 0 ERLIN2    |
| 224847_at   | -0,438043 | 1,35 | 8,50146E-06 | 0,00065608  | 4 | 1 | 1 | 0 CDK6      |
| 201641_at   | -0,48418  | 1,4  | 8,78017E-06 | 0,000674166 | 0 | 0 | 0 | 0 BST2      |
| 205462_s_at | -0,484512 | 1,4  | 8,8951E-06  | 0,000677656 | 1 | 0 | 0 | 0 HPCAL1    |
| 225364_at   | -0,427526 | 1,34 | 8,91477E-06 | 0,000677656 | 0 | 1 | 1 | 0 STK4      |
| 235350_at   | -0,444088 | 1,36 | 9,14207E-06 | 0,000690951 | 0 | 0 | 0 | 1 C4orf19   |
| 204584_at   | -0,431608 | 1,35 | 9,18944E-06 | 0,000690951 | 0 | 0 | 0 | 0 L1CAM     |
| 200955_at   | -0,434255 | 1,35 | 9,31151E-06 | 0,000693936 | 1 | 0 | 1 | 0 IMMT      |
| 222444_at   | 0,44724   | 1,36 | 9,57338E-06 | 0,000709971 | 0 | 0 | 0 | 0 ARMCX3    |
| 210130_s_at | -0,444919 | 1,36 | 9,91373E-06 | 0,000731643 | 0 | 0 | 0 | 0 TM7SF2    |
| 235545_at   | 0,440489  | 1,36 | 1,02346E-05 | 0,00074806  | 2 | 0 | 0 | 0 DEPDC1    |
| 202836_s_at | -0,437893 | 1,35 | 0,000010222 | 0,00074806  | 0 | 0 | 0 | 0 TXNL4A    |
| 215111_s_at | -0,41894  | 1,34 | 1,04495E-05 | 0,000760117 | 0 | 0 | 1 | 0 TSC2D1    |
| 224482_s_at | -0,430628 | 1,35 | 1,13787E-05 | 0,000823762 | 2 | 1 | 0 | 1 RAB11FIP4 |
| 228941_at   | 0,441881  | 1,36 | 1,20926E-05 | 0,000851129 | 1 | 0 | 0 | 0 ALG10B    |

|             |           |      |             |             |   |   |   |            |
|-------------|-----------|------|-------------|-------------|---|---|---|------------|
| 217878_s_at | 0,629506  | 1,55 | 1,19859E-05 | 0,000851129 | 1 | 1 | 1 | 0 CDC27    |
| 211998_at   | -0,42318  | 1,34 | 1,20643E-05 | 0,000851129 | 1 | 1 | 0 | 0 H3F3B    |
| 202780_at   | -0,419829 | 1,34 | 1,18993E-05 | 0,000851129 | 0 | 0 | 0 | 1 OXCT1    |
| 205016_at   | -0,424808 | 1,34 | 0,000011992 | 0,000851129 | 0 | 0 | 0 | 1 TGFA     |
| 222787_s_at | 0,518483  | 1,43 | 1,19415E-05 | 0,000851129 | 1 | 1 | 0 | 0 TMEM106B |
| 212872_s_at | -0,419324 | 1,34 | 1,22353E-05 | 0,000857202 | 1 | 0 | 0 | 1 MED20    |
| 238045_at   | -0,451873 | 1,37 | 1,31427E-05 | 0,000916556 | 1 | 0 | 1 | 1 TMEM65   |
| 231929_at   | -0,433975 | 1,35 | 1,32736E-05 | 0,000921457 | 2 | 0 | 1 | 1 IKZF2    |
| 204435_at   | 0,421592  | 1,34 | 1,33654E-05 | 0,000923612 | 1 | 0 | 0 | 0 NUPL1    |
| 203789_s_at | 0,445069  | 1,36 | 1,37772E-05 | 0,000947758 | 1 | 0 | 0 | 0 SEMA3C   |
| 225179_at   | -0,433479 | 1,35 | 0,000014068 | 0,000963405 | 1 | 1 | 1 | 0 UBE2K    |
| 208715_at   | -0,419929 | 1,34 | 1,45169E-05 | 0,000989687 | 1 | 0 | 0 | 1 TMCO1    |
| 208848_at   | -0,424412 | 1,34 | 1,46628E-05 | 0,000995172 | 0 | 0 | 2 | 0 ADH5     |
| 225327_at   | -0,410275 | 1,33 | 1,48288E-05 | 0,000997532 | 1 | 0 | 1 | 0 KIAA1370 |
| 235425_at   | 0,604895  | 1,52 | 1,48055E-05 | 0,000997532 | 0 | 0 | 0 | 0 SGL2     |
| 213285_at   | -0,418275 | 1,34 | 1,49153E-05 | 0,00099893  | 1 | 0 | 1 | 0 TMEM30B  |
| 203513_at   | -0,418017 | 1,34 | 1,51703E-05 | 0,00101155  | 0 | 0 | 1 | 1 SPG11    |
| 219390_at   | 0,434168  | 1,35 | 1,56024E-05 | 0,00103582  | 0 | 0 | 0 | 0 FKBP14   |
| 200973_s_at | -0,472317 | 1,39 | 1,61383E-05 | 0,00106674  | 1 | 1 | 0 | 0 TSPAN3   |
| 218184_at   | -0,425137 | 1,34 | 1,66478E-05 | 0,00109566  | 0 | 1 | 0 | 1 TULP4    |
| 224619_at   | -0,429178 | 1,35 | 1,72715E-05 | 0,0011318   | 2 | 0 | 1 | 0 CAS4     |
| 221748_s_at | -0,454598 | 1,37 | 1,78231E-05 | 0,00116294  | 2 | 1 | 0 | 0 TNS1     |
| 206488_s_at | -0,412293 | 1,33 | 1,79845E-05 | 0,00116846  | 0 | 0 | 0 | 0 CD36     |
| 200984_s_at | -0,468635 | 1,38 | 1,80866E-05 | 0,00117009  | 3 | 1 | 0 | 0 CD59     |
| 226321_at   | 0,435458  | 1,35 | 1,84305E-05 | 0,00118728  | 1 | 0 | 0 | 0 LYSMD3   |
| 212215_at   | 0,427966  | 1,35 | 1,88918E-05 | 0,00121187  | 0 | 0 | 0 | 0 PREPL    |
| 204484_at   | -0,412242 | 1,33 | 1,89976E-05 | 0,00121353  | 0 | 0 | 1 | 0 PIK3C2B  |
| 222552_at   | 0,41978   | 1,34 | 1,98285E-05 | 0,00126131  | 1 | 0 | 0 | 0 GOLT1B   |
| 225539_at   | -0,411447 | 1,33 | 1,99272E-05 | 0,00126231  | 2 | 2 | 0 | 1 ZNF295   |
| 218712_at   | 0,455703  | 1,37 | 2,01546E-05 | 0,00127141  | 1 | 0 | 0 | 0 C1orf109 |
| 208978_at   | -0,4481   | 1,36 | 0,000020681 | 0,00129923  | 0 | 0 | 0 | 0 CRIP2    |
| 212864_at   | -0,418124 | 1,34 | 2,08589E-05 | 0,00130501  | 0 | 0 | 0 | 1 CDS2     |
| 225706_at   | -0,426175 | 1,34 | 2,12717E-05 | 0,00132538  | 0 | 1 | 2 | 0 GLCCI1   |
| 228277_at   | -0,407852 | 1,33 | 2,14992E-05 | 0,00133409  | 0 | 1 | 0 | 0 FBXL19   |
| 226817_at   | 0,406518  | 1,33 | 2,17319E-05 | 0,00133654  | 0 | 1 | 0 | 0 DSC2     |
| 212856_at   | -0,403806 | 1,32 | 2,17883E-05 | 0,00133654  | 0 | 0 | 0 | 1 GRAMD4   |
| 219253_at   | -0,412598 | 1,33 | 2,18024E-05 | 0,00133654  | 1 | 1 | 0 | 0 TMEM185B |
| 225848_at   | -0,412835 | 1,33 | 2,21767E-05 | 0,00135402  | 1 | 0 | 0 | 1 ZNF746   |
| 202883_s_at | -0,409266 | 1,33 | 2,27259E-05 | 0,00138201  | 1 | 1 | 0 | 0 PPP2R1B  |
| 218447_at   | -0,403894 | 1,32 | 2,31448E-05 | 0,00139962  | 0 | 0 | 1 | 0 C16orf61 |
| 222466_s_at | -0,406191 | 1,33 | 2,31997E-05 | 0,00139962  | 1 | 1 | 0 | 1 MRPL42   |
| 225771_at   | -0,430362 | 1,35 | 2,39508E-05 | 0,00143923  | 1 | 2 | 1 | 0 AP1G1    |
| 203722_at   | -0,444666 | 1,36 | 2,48868E-05 | 0,001489    | 0 | 0 | 0 | 0 ALDH4A1  |
| 213185_at   | -0,404769 | 1,32 | 0,000024988 | 0,001489    | 0 | 0 | 1 | 1 KIAA0556 |
| 235289_at   | -0,415048 | 1,33 | 2,53959E-05 | 0,00150231  | 2 | 0 | 0 | 1 EIF5A2   |
| 218464_s_at | -0,405828 | 1,32 | 2,59306E-05 | 0,0015221   | 1 | 1 | 1 | 0 C17orf63 |
| 209454_s_at | -0,399239 | 1,32 | 2,58995E-05 | 0,0015221   | 0 | 0 | 1 | 0 TEAD3    |
| 224663_s_at | -0,397285 | 1,32 | 2,70367E-05 | 0,00158092  | 1 | 0 | 0 | 0 CFL2     |
| 229616_s_at | -0,407237 | 1,33 | 2,94669E-05 | 0,00171642  | 0 | 0 | 0 | 0 GRAMD2   |
| 226267_at   | -0,404992 | 1,32 | 2,96881E-05 | 0,0017227   | 0 | 0 | 0 | 1 JDP2     |
| 225853_at   | 0,397018  | 1,32 | 3,01083E-05 | 0,00173465  | 1 | 0 | 0 | 0 GNPAT1   |
| 201703_s_at | -0,406234 | 1,33 | 3,01221E-05 | 0,00173465  | 0 | 0 | 0 | 0 PPP1R10  |
| 202262_x_at | -0,423419 | 1,34 | 3,22457E-05 | 0,00184993  | 0 | 0 | 0 | 0 DDAH2    |
| 224649_x_at | -0,402842 | 1,32 | 3,29567E-05 | 0,00187233  | 1 | 0 | 0 | 0 CCNY     |
| 220520_s_at | -0,394174 | 1,31 | 3,30056E-05 | 0,00187233  | 1 | 1 | 1 | 0 NUP62CL  |
| 202731_at   | -0,424556 | 1,34 | 3,29208E-05 | 0,00187233  | 1 | 0 | 1 | 0 PDCD4    |
| 202066_at   | -0,392105 | 1,31 | 3,40292E-05 | 0,00192322  | 1 | 0 | 0 | 1 PPF1A1   |
| 202023_at   | -0,391368 | 1,31 | 3,45487E-05 | 0,00194535  | 0 | 0 | 0 | 0 EFNA1    |
| 206445_s_at | -0,450248 | 1,37 | 0,000034932 | 0,00195169  | 0 | 0 | 0 | 0 PRMT1    |
| 218032_at   | -0,397898 | 1,32 | 3,48201E-05 | 0,00195169  | 0 | 2 | 0 | 0 SNN      |
| 217853_at   | -0,392098 | 1,31 | 3,50465E-05 | 0,00195169  | 0 | 2 | 1 | 0 TNS3     |
| 225448_at   | -0,410177 | 1,33 | 3,52165E-05 | 0,001954    | 1 | 1 | 1 | 0 NAPG     |
| 201526_at   | -0,429814 | 1,35 | 3,53849E-05 | 0,00195621  | 0 | 0 | 0 | 0 ARF5     |
| 225612_s_at | -0,390121 | 1,31 | 3,62645E-05 | 0,0019836   | 0 | 0 | 0 | 0 B3GNT5   |
| 205498_at   | 0,414708  | 1,33 | 3,62718E-05 | 0,0019836   | 0 | 0 | 0 | 0 GHR      |
| 225858_s_at | 0,486672  | 1,4  | 3,62599E-05 | 0,0019836   | 4 | 0 | 0 | 0 XIAP     |
| 218528_s_at | -0,402804 | 1,32 | 0,000037182 | 0,00202608  | 1 | 0 | 0 | 1 RNF38    |
| 203397_s_at | -0,38875  | 1,31 | 3,76113E-05 | 0,00203489  | 1 | 1 | 0 | 0 GALNT3   |
| 223199_at   | -0,417333 | 1,34 | 3,75497E-05 | 0,00203489  | 1 | 0 | 0 | 0 MKNK2    |
| 211941_s_at | -0,458609 | 1,37 | 0,000038732 | 0,00208809  | 0 | 0 | 1 | 0 PEBP1    |

|             |           |      |             |            |   |   |   |   |          |
|-------------|-----------|------|-------------|------------|---|---|---|---|----------|
| 212799_at   | -0,393328 | 1,31 | 4,01337E-05 | 0,00215602 | 0 | 0 | 0 | 1 | STX6     |
| 202081_at   | -0,393522 | 1,31 | 4,24347E-05 | 0,0022716  | 0 | 0 | 1 | 0 | IER2     |
| 202887_s_at | -0,418094 | 1,34 | 4,28217E-05 | 0,00228428 | 0 | 0 | 0 | 1 | DDIT4    |
| 213927_at   | -0,397403 | 1,32 | 4,34288E-05 | 0,00230856 | 1 | 0 | 0 | 0 | MAP3K9   |
| 226980_at   | -0,3927   | 1,31 | 4,38467E-05 | 0,00231797 | 1 | 0 | 1 | 0 | DEPDC1B  |
| 218228_s_at | -0,384771 | 1,31 | 4,39108E-05 | 0,00231797 | 1 | 0 | 0 | 1 | TNKS2    |
| 209628_at   | -0,436578 | 1,35 | 4,47317E-05 | 0,00235314 | 0 | 0 | 1 | 0 | NXT2     |
| 237159_x_at | -0,405556 | 1,32 | 4,60343E-05 | 0,00241331 | 0 | 2 | 0 | 1 | AP1S3    |
| 214198_s_at | -0,384945 | 1,31 | 0,000046433 | 0,00242584 | 0 | 1 | 1 | 0 | DGCR2    |
| 200011_s_at | -0,385896 | 1,31 | 4,70837E-05 | 0,00245142 | 2 | 0 | 0 | 0 | ARF3     |
| 203751_x_at | -0,416876 | 1,34 | 4,79919E-05 | 0,00249017 | 0 | 0 | 0 | 0 | JUND     |
| 202581_at   | 0,402427  | 1,32 | 4,95406E-05 | 0,00256179 | 0 | 1 | 0 | 0 | HSPA1B   |
| 227651_at   | -0,403206 | 1,32 | 5,12626E-05 | 0,00264185 | 1 | 1 | 0 | 0 | NACC1    |
| 204602_at   | 0,387016  | 1,31 | 5,16227E-05 | 0,00265142 | 0 | 1 | 0 | 0 | DKK1     |
| 201019_s_at | 0,429682  | 1,35 | 5,40218E-05 | 0,00275537 | 0 | 0 | 0 | 0 | EIF1AX   |
| 235463_s_at | -0,397082 | 1,32 | 5,41903E-05 | 0,00275537 | 0 | 0 | 1 | 0 | LASS6    |
| 203852_s_at | -0,457095 | 1,37 | 5,47577E-05 | 0,00277494 | 0 | 0 | 1 | 0 | SMN1     |
| 209591_s_at | -0,400476 | 1,32 | 5,52102E-05 | 0,00278857 | 0 | 0 | 0 | 0 | BMP7     |
| 216080_s_at | -0,396595 | 1,32 | 5,58334E-05 | 0,00281071 | 0 | 0 | 1 | 0 | FADS3    |
| 210131_x_at | -0,412713 | 1,33 | 5,80936E-05 | 0,00291484 | 1 | 0 | 0 | 0 | SDHC     |
| 218076_s_at | -0,387846 | 1,31 | 5,84451E-05 | 0,00292283 | 0 | 0 | 1 | 0 | ARHGAP17 |
| 200602_at   | -0,472757 | 1,39 | 5,95299E-05 | 0,00296732 | 0 | 1 | 0 | 1 | APP      |
| 212616_at   | 0,415659  | 1,33 | 6,04962E-05 | 0,0030003  | 0 | 0 | 0 | 0 | CHD9     |
| 236620_at   | 0,536699  | 1,45 | 6,05862E-05 | 0,0030003  | 0 | 0 | 0 | 0 | RIF1     |
| 222425_s_at | -0,396481 | 1,32 | 0,000061965 | 0,00305862 | 0 | 0 | 0 | 0 | POLDIP2  |
| 210092_at   | -0,40359  | 1,32 | 6,39243E-05 | 0,00314512 | 0 | 0 | 0 | 0 | MAGO     |
| 222662_at   | 0,383813  | 1,3  | 6,64972E-05 | 0,00326115 | 0 | 0 | 0 | 0 | PPP1R3B  |
| 225537_at   | 0,379114  | 1,3  | 6,69988E-05 | 0,00327519 | 0 | 2 | 0 | 0 | TRAPPC6B |
| 226038_at   | -0,383408 | 1,3  | 6,74535E-05 | 0,00328684 | 0 | 0 | 1 | 0 | LONRF1   |
| 1553179_at  | 0,441052  | 1,36 | 0,000068997 | 0,00334064 | 0 | 0 | 1 | 0 | ADAMTS19 |
| 231871_at   | 0,410276  | 1,33 | 6,87899E-05 | 0,00334064 | 2 | 0 | 0 | 0 | GPR180   |
| 223179_at   | -0,37219  | 1,29 | 7,14679E-05 | 0,00344929 | 0 | 0 | 0 | 0 | YPEL3    |
| 221765_at   | 0,438286  | 1,35 | 7,25177E-05 | 0,00347788 | 0 | 0 | 0 | 0 | UGCG     |
| 211672_s_at | -0,46632  | 1,38 | 0,000074531 | 0,00356319 | 0 | 1 | 0 | 0 | ARPC4    |
| 239481_at   | 0,428712  | 1,35 | 7,84527E-05 | 0,00370409 | 2 | 1 | 0 | 0 | FAM133A  |
| 202797_at   | -0,409423 | 1,33 | 7,82581E-05 | 0,00370409 | 0 | 0 | 0 | 1 | SACM1L   |
| 222557_at   | -0,36956  | 1,29 | 7,79898E-05 | 0,00370409 | 0 | 1 | 0 | 0 | STMN3    |
| 216483_s_at | -0,42743  | 1,34 | 7,88718E-05 | 0,00371235 | 0 | 0 | 0 | 0 | C19orf10 |
| 227792_at   | -0,394771 | 1,31 | 8,02781E-05 | 0,00376688 | 2 | 1 | 1 | 0 | ITPRIPL2 |
| 209605_at   | -0,3843   | 1,31 | 8,20062E-05 | 0,00382436 | 0 | 1 | 0 | 0 | TST      |
| 219798_s_at | -0,367027 | 1,29 | 8,28293E-05 | 0,00384848 | 0 | 0 | 1 | 0 | MEPCE    |
| 204105_s_at | -0,379205 | 1,3  | 8,30297E-05 | 0,00384848 | 1 | 1 | 0 | 1 | NRCAM    |
| 221249_s_at | -0,36516  | 1,29 | 8,73567E-05 | 0,00403673 | 1 | 0 | 0 | 0 | FAM117A  |
| 203365_s_at | -0,373238 | 1,3  | 8,94218E-05 | 0,00411964 | 0 | 0 | 0 | 1 | MMP15    |
| 207079_s_at | -0,452119 | 1,37 | 9,08548E-05 | 0,00417301 | 0 | 0 | 1 | 0 | MED6     |
| 212266_s_at | -0,424182 | 1,34 | 9,19988E-05 | 0,00421283 | 0 | 0 | 0 | 0 | SFRS5    |
| 212211_at   | -0,376229 | 1,3  | 9,41959E-05 | 0,00427481 | 0 | 0 | 0 | 1 | ANKRD17  |
| 201681_s_at | -0,371962 | 1,29 | 9,38901E-05 | 0,00427481 | 1 | 0 | 0 | 1 | DLG5     |
| 229796_at   | -0,386025 | 1,31 | 9,40025E-05 | 0,00427481 | 2 | 0 | 0 | 2 | SIX4     |
| 218384_at   | -0,382021 | 1,3  | 9,46153E-05 | 0,00428106 | 0 | 0 | 0 | 0 | CARHSP1  |
| 209421_at   | -0,367953 | 1,29 | 9,80421E-05 | 0,00442295 | 0 | 0 | 0 | 0 | MSH2     |
| 225601_at   | -0,391005 | 1,31 | 9,89114E-05 | 0,00444897 | 2 | 0 | 1 | 0 | HMGB3    |
| 225928_at   | -0,367242 | 1,29 | 9,97018E-05 | 0,00447129 | 0 | 0 | 0 | 0 | RDH11    |
| 204444_at   | -0,368864 | 1,29 | 0,000100446 | 0,00447918 | 0 | 0 | 0 | 1 | KIF11    |
| 207121_s_at | -0,366112 | 1,29 | 0,000100467 | 0,00447918 | 1 | 2 | 0 | 0 | MAPK6    |
| 218894_s_at | 0,370278  | 1,29 | 0,000103566 | 0,00460384 | 0 | 1 | 0 | 0 | MAGOHB   |
| 228123_s_at | -0,374987 | 1,3  | 0,000106013 | 0,00469889 | 0 | 0 | 0 | 0 | ABHD12   |
| 1555916_at  | 0,39248   | 1,31 | 0,000106771 | 0,00471873 | 0 | 0 | 0 | 0 | RPUSD3   |
| 208900_s_at | 0,560632  | 1,47 | 0,000110665 | 0,00487665 | 0 | 1 | 0 | 0 | TOP1     |
| 224321_at   | 0,614212  | 1,53 | 0,00011131  | 0,0048909  | 0 | 0 | 0 | 0 | TMEFF2   |
| 202214_s_at | -0,371261 | 1,29 | 0,000112469 | 0,00492756 | 2 | 1 | 1 | 0 | CUL4B    |
| 230075_at   | -0,369368 | 1,29 | 0,000116641 | 0,00509568 | 0 | 0 | 0 | 1 | RAB39B   |
| 227856_at   | -0,397486 | 1,32 | 0,000120336 | 0,00524203 | 3 | 0 | 0 | 1 | C4orf32  |
| 209665_at   | -0,363445 | 1,29 | 0,000120975 | 0,00525481 | 0 | 0 | 0 | 1 | CYB561D2 |
| 212848_s_at | 0,3614    | 1,28 | 0,000121785 | 0,00527492 | 0 | 0 | 0 | 0 | C9orf3   |
| 204172_at   | 0,369271  | 1,29 | 0,000122733 | 0,00529489 | 0 | 0 | 0 | 0 | CPOX     |
| 210470_x_at | -0,381338 | 1,3  | 0,000122943 | 0,00529489 | 0 | 1 | 1 | 0 | NONO     |
| 208659_at   | -0,386429 | 1,31 | 0,000125061 | 0,00537091 | 0 | 0 | 0 | 0 | CLIC1    |
| 203581_at   | -0,364444 | 1,29 | 0,000126242 | 0,00540635 | 1 | 0 | 1 | 1 | RAB4A    |
| 225642_at   | -0,368424 | 1,29 | 0,000127812 | 0,00545821 | 0 | 0 | 0 | 2 | KTI12    |

|              |           |      |             |            |   |   |   |   |            |
|--------------|-----------|------|-------------|------------|---|---|---|---|------------|
| 205967_at    | 0,492319  | 1,41 | 0,000128924 | 0,00549029 | 0 | 0 | 0 | 0 | HIST1H4C   |
| 205264_at    | 0,384746  | 1,31 | 0,000129593 | 0,00550337 | 0 | 0 | 0 | 0 | CD3EAP     |
| 201476_s_at  | -0,397368 | 1,32 | 0,000131638 | 0,00557464 | 0 | 0 | 1 | 0 | RRM1       |
| 228338_at    | -0,363144 | 1,29 | 0,000134117 | 0,00566385 | 0 | 0 | 0 | 0 | LOC120376  |
| 222809_x_at  | -0,355039 | 1,28 | 0,000136249 | 0,00573794 | 1 | 0 | 0 | 0 | CCDC85C    |
| 239002_at    | 0,36785   | 1,29 | 0,000137305 | 0,00576643 | 0 | 0 | 0 | 0 | ASPM       |
| 224617_at    | -0,353915 | 1,28 | 0,00013797  | 0,00577841 | 4 | 0 | 0 | 1 | ROD1       |
| 218799_at    | -0,360543 | 1,28 | 0,000138405 | 0,00578067 | 1 | 0 | 0 | 0 | GPN2       |
| 208786_s_at  | -0,368679 | 1,29 | 0,000138905 | 0,0057857  | 0 | 1 | 0 | 0 | MAP1LC3B   |
| 223288_at    | -0,364851 | 1,29 | 0,000140482 | 0,00582699 | 0 | 0 | 0 | 1 | USP38      |
| 200670_at    | 0,424389  | 1,34 | 0,000140663 | 0,00582699 | 1 | 0 | 0 | 0 | XBP1       |
| 212518_at    | -0,350127 | 1,27 | 0,000142783 | 0,00589873 | 0 | 0 | 1 | 1 | PIP5K1C    |
| 224859_at    | -0,367256 | 1,29 | 0,000143181 | 0,00589915 | 0 | 0 | 0 | 0 | CD276      |
| 201467_s_at  | -0,37726  | 1,3  | 0,000147269 | 0,00603484 | 0 | 0 | 0 | 0 | NQO1       |
| 204341_at    | -0,388688 | 1,31 | 0,000150305 | 0,00614271 | 0 | 0 | 0 | 0 | TRIM16     |
| 222235_s_at  | 0,374745  | 1,3  | 0,000151979 | 0,00619447 | 1 | 1 | 0 | 0 | CSGALNACT2 |
| 201642_at    | -0,348057 | 1,27 | 0,000152858 | 0,00621364 | 0 | 0 | 0 | 0 | IFNGR2     |
| 201960_s_at  | 0,399699  | 1,32 | 0,000158591 | 0,0064124  | 0 | 0 | 0 | 0 | MYCBP2     |
| 211084_x_at  | -0,358756 | 1,28 | 0,000158209 | 0,0064124  | 1 | 2 | 0 | 1 | PRKD3      |
| 225125_at    | -0,367157 | 1,29 | 0,000160133 | 0,00645758 | 5 | 1 | 1 | 1 | MMGT1      |
| 242974_at    | -0,352276 | 1,28 | 0,000160937 | 0,00647283 | 1 | 0 | 0 | 0 | CD47       |
| 202145_at    | -0,37558  | 1,3  | 0,000162034 | 0,00649976 | 0 | 0 | 0 | 0 | LY6E       |
| 223839_s_at  | 0,439621  | 1,36 | 0,000169297 | 0,0067732  | 0 | 0 | 0 | 0 | SCD        |
| 228989_at    | -0,347763 | 1,27 | 0,000172974 | 0,00687394 | 0 | 0 | 0 | 1 | C18orf56   |
| 223240_at    | -0,354615 | 1,28 | 0,000173193 | 0,00687394 | 0 | 0 | 0 | 0 | FBXO8      |
| 210387_at    | -0,360433 | 1,28 | 0,000173623 | 0,00687394 | 0 | 0 | 0 | 0 | HIST1H2BG  |
| 218641_at    | -0,345689 | 1,27 | 0,000173348 | 0,00687394 | 1 | 0 | 0 | 0 | LOC65998   |
| 200969_at    | -0,364337 | 1,29 | 0,000179487 | 0,00708766 | 1 | 0 | 1 | 0 | SERP1      |
| 204540_at    | -0,371651 | 1,29 | 0,000180742 | 0,00711872 | 0 | 0 | 0 | 0 | EEF1A2     |
| 203407_at    | -0,347872 | 1,27 | 0,000181874 | 0,0071448  | 0 | 0 | 0 | 0 | PPL        |
| 206555_s_at  | 0,427969  | 1,35 | 0,000184086 | 0,00721305 | 0 | 0 | 0 | 0 | THUMPDI    |
| 221952_x_at  | -0,35145  | 1,28 | 0,000187429 | 0,00732516 | 1 | 0 | 0 | 0 | TRMT5      |
| 223658_at    | 0,360097  | 1,28 | 0,000188013 | 0,00732915 | 0 | 0 | 0 | 0 | KCNK6      |
| 204284_at    | 0,344676  | 1,27 | 0,000188547 | 0,00733115 | 0 | 1 | 0 | 0 | PPP1R3C    |
| 223190_s_at  | 0,391364  | 1,31 | 0,000189371 | 0,0073444  | 1 | 0 | 0 | 0 | MLL5       |
| 226874_at    | 0,364821  | 1,29 | 0,000192666 | 0,00745318 | 1 | 0 | 0 | 0 | KLHL8      |
| 225001_at    | -0,347285 | 1,27 | 0,000193671 | 0,00745411 | 0 | 0 | 0 | 0 | RAB3D      |
| 201207_at    | -0,345661 | 1,27 | 0,000201645 | 0,00774142 | 0 | 0 | 1 | 0 | TNFAIP1    |
| 214797_s_at  | -0,349179 | 1,27 | 0,000202889 | 0,00776959 | 0 | 0 | 1 | 0 | PCTK3      |
| 1554417_s_at | -0,419989 | 1,34 | 0,000203759 | 0,00778327 | 0 | 0 | 0 | 0 | APH1A      |
| 218259_at    | -0,364413 | 1,29 | 0,000208416 | 0,00794121 | 2 | 3 | 1 | 1 | MKL2       |
| 224695_at    | -0,341031 | 1,27 | 0,000210089 | 0,00798497 | 0 | 0 | 1 | 0 | C2orf29    |
| 225474_at    | -0,36878  | 1,29 | 0,000214272 | 0,00812365 | 0 | 1 | 1 | 1 | MAG11      |
| 227013_at    | -0,362573 | 1,29 | 0,000218133 | 0,00824944 | 2 | 0 | 0 | 0 | LATS2      |
| 214721_x_at  | -0,337465 | 1,26 | 0,000225538 | 0,00850834 | 0 | 0 | 0 | 0 | CDC42EP4   |
| 206247_at    | 0,363303  | 1,29 | 0,000233811 | 0,00877687 | 0 | 0 | 0 | 0 | MICB       |
| 201970_s_at  | -0,354006 | 1,28 | 0,000233574 | 0,00877687 | 0 | 0 | 0 | 0 | NASP       |
| 209522_s_at  | -0,342043 | 1,27 | 0,000236376 | 0,00885129 | 0 | 0 | 0 | 0 | CRAT       |
| 201337_s_at  | -0,343314 | 1,27 | 0,000238371 | 0,00890406 | 2 | 0 | 0 | 0 | VAMP3      |
| 212899_at    | -0,342326 | 1,27 | 0,000240433 | 0,00895906 | 3 | 1 | 0 | 0 | CDC2L6     |
| 208895_s_at  | 0,499545  | 1,41 | 0,000242337 | 0,00900795 | 1 | 0 | 0 | 0 | DDX18      |
| 209258_s_at  | 0,557288  | 1,47 | 0,000243365 | 0,0090241  | 0 | 0 | 0 | 0 | SMC3       |
| 202575_at    | -0,352521 | 1,28 | 0,000246317 | 0,00911135 | 0 | 0 | 0 | 0 | CRABP2     |
| 1557227_s_at | 0,415389  | 1,33 | 0,000247416 | 0,00912975 | 0 | 1 | 0 | 0 | TPR        |
| 232079_s_at  | -0,367465 | 1,29 | 0,000254559 | 0,00937061 | 2 | 0 | 0 | 0 | PVRL2      |
| 242579_at    | 0,408661  | 1,33 | 0,000258551 | 0,00949458 | 1 | 1 | 0 | 0 | BMPR1B     |
| 226886_at    | 0,347428  | 1,27 | 0,000260259 | 0,00953425 | 2 | 0 | 0 | 0 | GFPT1      |
| 203919_at    | -0,367241 | 1,29 | 0,000263433 | 0,00962735 | 0 | 0 | 0 | 0 | TCEA2      |
| 1555837_s_at | -0,34181  | 1,27 | 0,000269028 | 0,00978476 | 0 | 0 | 1 | 0 | POLR2B     |
| 233555_s_at  | -0,397606 | 1,32 | 0,000268515 | 0,00978476 | 0 | 0 | 0 | 0 | SULF2      |
| 228851_s_at  | -0,451142 | 1,37 | 0,000272906 | 0,00990211 | 1 | 0 | 0 | 0 | ENSA       |
| 213069_at    | -0,334036 | 1,26 | 0,000273562 | 0,00990229 | 2 | 0 | 0 | 1 | HEG1       |
| 1557129_a_at | 0,418787  | 1,34 | 0,000276775 | 0,0099948  | 0 | 0 | 0 | 0 | FAM111B    |
| 224985_at    | -0,341658 | 1,27 | 0,000277558 | 0,0099933  | 3 | 0 | 1 | 0 | NRAS       |
| 200702_s_at  | 0,557468  | 1,47 | 0,000283417 | 0,0101695  | 0 | 0 | 0 | 0 | DDX24      |
| 222987_s_at  | -0,412795 | 1,33 | 0,000283619 | 0,0101695  | 0 | 0 | 0 | 0 | TMEM9      |
| 1554679_a_at | -0,378482 | 1,3  | 0,000289086 | 0,0103411  | 0 | 0 | 0 | 0 | LAPTM4B    |
| 1555894_s_at | -0,336033 | 1,26 | 0,000291254 | 0,0103942  | 1 | 0 | 0 | 1 | MTSS1L     |
| 228242_at    | -0,355852 | 1,28 | 0,000292353 | 0,010409   | 0 | 0 | 0 | 0 | N4BP2      |
| 200990_at    | -0,34572  | 1,27 | 0,000293648 | 0,0104307  | 0 | 0 | 0 | 0 | TRIM28     |

|             |           |      |             |           |   |   |   |             |
|-------------|-----------|------|-------------|-----------|---|---|---|-------------|
| 230238_at   | -0,355456 | 1,28 | 0,00029466  | 0,0104422 | 0 | 0 | 1 | 0 ANKRD43   |
| 214614_at   | -0,339494 | 1,27 | 0,000298274 | 0,0105213 | 0 | 0 | 1 | 0 MNX1      |
| 211987_at   | -0,344642 | 1,27 | 0,000298116 | 0,0105213 | 0 | 0 | 1 | 0 TOP2B     |
| 200747_s_at | -0,346977 | 1,27 | 0,000301109 | 0,0105967 | 1 | 0 | 0 | 0 NUMA1     |
| 225060_at   | -0,343156 | 1,27 | 0,000302256 | 0,0106125 | 0 | 0 | 0 | 0 LRP11     |
| 218534_s_at | -0,348822 | 1,27 | 0,00030739  | 0,0107438 | 0 | 0 | 0 | 1 AGGF1     |
| 224706_at   | -0,331616 | 1,26 | 0,000308118 | 0,0107438 | 0 | 0 | 0 | 0 KIAA2013  |
| 204634_at   | -0,349795 | 1,27 | 0,000307969 | 0,0107438 | 1 | 0 | 0 | 1 NEK4      |
| 222754_at   | 0,345563  | 1,27 | 0,000309927 | 0,0107822 | 0 | 0 | 0 | 0 TRNT1     |
| 209518_at   | -0,340676 | 1,27 | 0,000311695 | 0,0108189 | 1 | 0 | 1 | 0 SMARCD1   |
| 223378_at   | -0,338814 | 1,26 | 0,000316361 | 0,0109559 | 0 | 0 | 0 | 0 GLIS2     |
| 224714_at   | 0,356723  | 1,28 | 0,000320435 | 0,0110217 | 0 | 0 | 0 | 0 MKI67IP   |
| 224952_at   | -0,337155 | 1,26 | 0,000320097 | 0,0110217 | 1 | 0 | 0 | 1 TANC2     |
| 226199_at   | -0,332648 | 1,26 | 0,000322166 | 0,0110562 | 2 | 0 | 1 | 0 UPRT      |
| 203953_s_at | -0,410376 | 1,33 | 0,000324338 | 0,0111056 | 0 | 0 | 0 | 0 CLDN3     |
| 224071_at   | -0,368891 | 1,29 | 0,000326333 | 0,0111489 | 0 | 1 | 0 | 0 IL20      |
| 214314_s_at | 0,380805  | 1,3  | 0,000353336 | 0,0119905 | 1 | 0 | 0 | 0 EIF5B     |
| 204742_s_at | -0,345565 | 1,27 | 0,000358809 | 0,0121375 | 1 | 2 | 0 | 1 PDS5B     |
| 201368_at   | -0,334608 | 1,26 | 0,000359264 | 0,0121375 | 1 | 1 | 0 | 1 ZFP36L2   |
| 205195_at   | -0,407139 | 1,33 | 0,000365895 | 0,0122528 | 0 | 0 | 0 | 0 AP1S1     |
| 206070_s_at | 0,332683  | 1,26 | 0,000365058 | 0,0122528 | 1 | 0 | 0 | 0 EPHA3     |
| 224159_x_at | 0,406624  | 1,33 | 0,000364759 | 0,0122528 | 2 | 0 | 0 | 0 TRIM4     |
| 212595_s_at | -0,390744 | 1,31 | 0,000373385 | 0,012476  | 0 | 1 | 1 | 0 DAZAP2    |
| 235117_at   | -0,346335 | 1,27 | 0,000376321 | 0,0125465 | 0 | 0 | 0 | 1 CHAC2     |
| 201972_at   | 0,350048  | 1,27 | 0,000382035 | 0,0127092 | 0 | 1 | 0 | 0 ATP6V1A   |
| 239835_at   | -0,332969 | 1,26 | 0,000383338 | 0,0127261 | 3 | 0 | 1 | 1 KBTBD8    |
| 212730_at   | -0,323054 | 1,25 | 0,000391321 | 0,0129613 | 0 | 0 | 0 | 0 SYNM      |
| 201153_s_at | -0,341033 | 1,27 | 0,00039227  | 0,0129645 | 0 | 2 | 0 | 1 MBNL1     |
| 227443_at   | 0,324889  | 1,25 | 0,000397095 | 0,0130955 | 2 | 0 | 0 | 0 C9orf150  |
| 210827_s_at | -0,335052 | 1,26 | 0,000399265 | 0,0131102 | 1 | 0 | 0 | 0 ELF3      |
| 202975_s_at | 0,435283  | 1,35 | 0,000398686 | 0,0131102 | 2 | 0 | 0 | 0 RHOBTB3   |
| 213088_s_at | -0,326679 | 1,25 | 0,000405776 | 0,0132667 | 0 | 0 | 0 | 0 DNAJC9    |
| 204042_at   | 0,331342  | 1,26 | 0,00040513  | 0,0132667 | 1 | 0 | 0 | 0 WASF3     |
| 212919_at   | -0,33015  | 1,26 | 0,00040864  | 0,0133317 | 7 | 2 | 1 | 0 DCP2      |
| 209380_s_at | -0,328109 | 1,26 | 0,000410793 | 0,0133732 | 1 | 0 | 0 | 1 ABCC5     |
| 204278_s_at | -0,379161 | 1,3  | 0,000413777 | 0,0134416 | 0 | 0 | 1 | 0 EBAG9     |
| 228065_at   | -0,337597 | 1,26 | 0,000415051 | 0,0134542 | 0 | 0 | 0 | 1 BCL9L     |
| 204076_at   | -0,325659 | 1,25 | 0,000418439 | 0,0135129 | 0 | 1 | 0 | 0 ENTDP4    |
| 224747_at   | 0,329054  | 1,26 | 0,000418641 | 0,0135129 | 0 | 1 | 0 | 0 UBE2Q2    |
| 226419_s_at | -0,346169 | 1,27 | 0,000421651 | 0,0135813 | 1 | 0 | 0 | 0 SFRS1     |
| 203665_at   | -0,340218 | 1,27 | 0,000426998 | 0,0137244 | 0 | 0 | 0 | 0 HMOX1     |
| 221677_s_at | -0,33629  | 1,26 | 0,000432083 | 0,0138585 | 0 | 0 | 0 | 0 DONSON    |
| 208127_s_at | -0,328376 | 1,26 | 0,000433286 | 0,0138679 | 1 | 1 | 1 | 1 SOCS5     |
| 224751_at   | -0,329101 | 1,26 | 0,00043487  | 0,0138893 | 1 | 0 | 1 | 0 PL-5283   |
| 211136_s_at | -0,345103 | 1,27 | 0,000438622 | 0,0139798 | 0 | 0 | 0 | 0 CLPTM1    |
| 227973_at   | 0,396115  | 1,32 | 0,000442075 | 0,0140604 | 1 | 0 | 0 | 0 C2orf69   |
| 201196_s_at | 0,331652  | 1,26 | 0,000447157 | 0,0141923 | 0 | 0 | 0 | 0 AMD1      |
| 243295_at   | 0,353028  | 1,28 | 0,00045946  | 0,0145525 | 1 | 1 | 0 | 0 RBM27     |
| 225984_at   | -0,368946 | 1,29 | 0,000463304 | 0,0146437 | 1 | 1 | 0 | 1 PRKAA1    |
| 212510_at   | -0,321597 | 1,25 | 0,000466917 | 0,0147273 | 0 | 1 | 1 | 0 GPD1L     |
| 216248_s_at | 0,333845  | 1,26 | 0,000468269 | 0,0147393 | 0 | 0 | 0 | 0 NR4A2     |
| 201087_at   | -0,320294 | 1,25 | 0,000469721 | 0,0147545 | 0 | 0 | 0 | 0 PXN       |
| 201918_at   | 0,443431  | 1,36 | 0,000472749 | 0,014819  | 0 | 1 | 0 | 0 SLC25A36  |
| 215728_s_at | -0,352625 | 1,28 | 0,000476516 | 0,0148797 | 0 | 0 | 0 | 0 ACOT7     |
| 228345_at   | 0,327407  | 1,25 | 0,000476642 | 0,0148797 | 1 | 0 | 0 | 0 CHIC1     |
| 204212_at   | -0,322001 | 1,25 | 0,000488122 | 0,0152068 | 0 | 0 | 0 | 0 ACOT8     |
| 218412_s_at | -0,318482 | 1,25 | 0,000499253 | 0,0155218 | 0 | 0 | 0 | 0 GTF2IRD1  |
| 211126_s_at | -0,3249   | 1,25 | 0,000514183 | 0,0159533 | 1 | 0 | 0 | 1 CSRP2     |
| 208750_s_at | -0,417774 | 1,34 | 0,000518319 | 0,0160489 | 0 | 0 | 0 | 0 ARF1      |
| 209189_at   | -0,327985 | 1,26 | 0,00052167  | 0,0161198 | 1 | 0 | 0 | 1 FOS       |
| 221045_s_at | -0,315301 | 1,24 | 0,00052321  | 0,0161346 | 1 | 0 | 0 | 0 PER3      |
| 218368_s_at | -0,346078 | 1,27 | 0,000525647 | 0,0161769 | 0 | 0 | 0 | 0 TNFRSF12A |
| 1556308_at  | -0,318144 | 1,25 | 0,00052835  | 0,0162273 | 0 | 0 | 0 | 0 PRRT3     |
| 201286_at   | -0,322257 | 1,25 | 0,000534899 | 0,0163953 | 0 | 0 | 0 | 0 SDC1      |
| 221020_s_at | 0,327439  | 1,25 | 0,000536885 | 0,0164231 | 0 | 1 | 0 | 0 SLC25A32  |
| 222533_at   | -0,32543  | 1,25 | 0,00053892  | 0,0164522 | 1 | 1 | 0 | 0 CRBN      |
| 225232_at   | -0,319917 | 1,25 | 0,000541978 | 0,0164794 | 0 | 1 | 1 | 0 MTMR12    |
| 212582_at   | 0,383607  | 1,3  | 0,000541267 | 0,0164794 | 2 | 0 | 0 | 0 OSBPL8    |
| 226524_at   | -0,32618  | 1,25 | 0,000543586 | 0,0164953 | 1 | 1 | 1 | 0 C3orf38   |
| 200927_s_at | -0,315657 | 1,24 | 0,000551035 | 0,016688  | 1 | 2 | 0 | 0 RAB14     |

|              |           |      |             |           |   |   |   |            |
|--------------|-----------|------|-------------|-----------|---|---|---|------------|
| 207625_s_at  | -0,327874 | 1,26 | 0,000553555 | 0,0166997 | 0 | 1 | 0 | 1 CBFA2T2  |
| 213153_at    | -0,313934 | 1,24 | 0,000559962 | 0,0168576 | 0 | 0 | 0 | 0 SETD1B   |
| 223659_at    | -0,323716 | 1,25 | 0,000568703 | 0,0170533 | 0 | 0 | 0 | 0 TMPRSS13 |
| 205191_at    | 0,3482    | 1,27 | 0,000572661 | 0,0171381 | 0 | 0 | 0 | 0 RP2      |
| 203238_s_at  | -0,315375 | 1,24 | 0,000574098 | 0,0171474 | 0 | 0 | 0 | 0 NOTCH3   |
| 224866_at    | -0,336109 | 1,26 | 0,000581807 | 0,0173436 | 1 | 0 | 0 | 1 FAR1     |
| 214464_at    | 0,37454   | 1,3  | 0,000585348 | 0,017415  | 0 | 0 | 0 | 0 CDC42BPA |
| 225889_at    | -0,340477 | 1,27 | 0,000595296 | 0,0176419 | 4 | 1 | 1 | 1 AEBP2    |
| 205870_at    | -0,312612 | 1,24 | 0,000594637 | 0,0176419 | 1 | 0 | 0 | 0 BDKRB2   |
| 224469_s_at  | 0,31768   | 1,25 | 0,000598697 | 0,0177081 | 0 | 0 | 0 | 0 INF2     |
| 201282_at    | -0,325155 | 1,25 | 0,000606118 | 0,0178928 | 0 | 0 | 0 | 0 OGDH     |
| 201054_at    | -0,317911 | 1,25 | 0,000613123 | 0,0180645 | 0 | 0 | 1 | 0 HNRNPA0  |
| 212697_at    | -0,313905 | 1,24 | 0,000622918 | 0,0183176 | 1 | 0 | 0 | 0 FAM134C  |
| 201390_s_at  | -0,320983 | 1,25 | 0,000629869 | 0,0184863 | 0 | 0 | 0 | 0 CSNK2B   |
| 218513_at    | 0,376214  | 1,3  | 0,000635928 | 0,0186152 | 0 | 0 | 0 | 0 C4orf43  |
| 202876_s_at  | -0,311476 | 1,24 | 0,00063671  | 0,0186152 | 0 | 0 | 0 | 0 PBX2     |
| 227628_at    | 0,312201  | 1,24 | 0,000639981 | 0,0186749 | 0 | 0 | 0 | 0 GPX8     |
| 225129_at    | -0,31731  | 1,25 | 0,000645536 | 0,0187126 | 0 | 0 | 0 | 0 CPNE2    |
| 227002_at    | -0,312528 | 1,24 | 0,000646509 | 0,0187126 | 0 | 0 | 1 | 1 FAM78A   |
| 228230_at    | -0,314022 | 1,24 | 0,000646633 | 0,0187126 | 0 | 0 | 0 | 0 PRIC285  |
| 233385_x_at  | -0,311744 | 1,24 | 0,000645161 | 0,0187126 | 0 | 0 | 0 | 0 RAB4B    |
| 203611_at    | -0,323095 | 1,25 | 0,000647425 | 0,0187126 | 0 | 0 | 1 | 0 TERF2    |
| 235542_at    | -0,310458 | 1,24 | 0,000656085 | 0,0189269 | 0 | 2 | 0 | 0 TET3     |
| 221585_at    | -0,32035  | 1,25 | 0,000660545 | 0,0190194 | 0 | 0 | 0 | 0 CACNG4   |
| 220949_s_at  | -0,317911 | 1,25 | 0,000665586 | 0,0191284 | 0 | 0 | 1 | 0 C7orf49  |
| 222575_at    | -0,354254 | 1,28 | 0,000670106 | 0,0192219 | 2 | 1 | 1 | 0 SETD5    |
| 209687_at    | 0,313502  | 1,24 | 0,000676635 | 0,0193522 | 0 | 1 | 0 | 0 CXCL12   |
| 203489_at    | -0,387842 | 1,31 | 0,000677194 | 0,0193522 | 0 | 0 | 0 | 0 SIVA1    |
| 204041_at    | -0,334824 | 1,26 | 0,000682796 | 0,0194757 | 1 | 2 | 0 | 0 MAOB     |
| 224502_s_at  | -0,310437 | 1,24 | 0,000686996 | 0,0195588 | 0 | 0 | 1 | 0 KIAA1191 |
| 201448_at    | -0,34223  | 1,27 | 0,000697468 | 0,0198198 | 1 | 0 | 0 | 1 TIA1     |
| 203638_s_at  | 0,308428  | 1,24 | 0,000700023 | 0,0198244 | 0 | 0 | 0 | 0 FGFR2    |
| 201245_s_at  | -0,345438 | 1,27 | 0,000700236 | 0,0198244 | 0 | 0 | 0 | 0 OTUB1    |
| 219653_at    | -0,324581 | 1,25 | 0,000707179 | 0,0199705 | 0 | 1 | 0 | 0 LSM14B   |
| 212095_s_at  | 0,322342  | 1,25 | 0,000708024 | 0,0199705 | 0 | 0 | 0 | 0 MTUS1    |
| 218165_at    | -0,312787 | 1,24 | 0,000711081 | 0,0200196 | 0 | 1 | 0 | 0 C1orf149 |
| 231120_x_at  | 0,322225  | 1,25 | 0,000714526 | 0,0200423 | 1 | 0 | 0 | 0 PKIB     |
| 213222_at    | -0,320435 | 1,25 | 0,000714195 | 0,0200423 | 0 | 2 | 1 | 0 PLCB1    |
| 202763_at    | -0,307395 | 1,24 | 0,000722295 | 0,0201487 | 1 | 0 | 0 | 1 CASP3    |
| 226322_at    | 0,360551  | 1,28 | 0,000719879 | 0,0201487 | 0 | 0 | 1 | 0 TMTC1    |
| 216272_x_at  | -0,309892 | 1,24 | 0,000724592 | 0,0201758 | 1 | 0 | 0 | 0 SYDE1    |
| 220189_s_at  | -0,328695 | 1,26 | 0,00072709  | 0,0202083 | 0 | 0 | 0 | 0 MGAT4B   |
| 233647_s_at  | 0,313407  | 1,24 | 0,00072868  | 0,0202155 | 0 | 0 | 0 | 0 CDADC1   |
| 223039_at    | -0,322393 | 1,25 | 0,000734153 | 0,0203303 | 0 | 0 | 0 | 0 C22orf13 |
| 1563431_x_at | 0,443039  | 1,36 | 0,000744185 | 0,0205706 | 0 | 0 | 0 | 0 CALM3    |
| 212412_at    | 0,31806   | 1,25 | 0,000747015 | 0,0206114 | 0 | 0 | 0 | 0 PDLIM5   |
| 223266_at    | 0,32332   | 1,25 | 0,000750324 | 0,0206652 | 0 | 0 | 0 | 0 STRADB   |
| 218021_at    | -0,32692  | 1,25 | 0,000754783 | 0,0207129 | 1 | 0 | 0 | 0 DHRS4    |
| 209531_at    | -0,333407 | 1,26 | 0,000753537 | 0,0207129 | 1 | 0 | 0 | 0 GSTZ1    |
| 224655_at    | -0,316376 | 1,25 | 0,000759894 | 0,0208156 | 0 | 0 | 1 | 0 AK3      |
| 216563_at    | 0,401128  | 1,32 | 0,000778247 | 0,0212645 | 3 | 1 | 0 | 0 ANKRD12  |
| 225426_at    | -0,334573 | 1,26 | 0,000783056 | 0,0213348 | 1 | 0 | 1 | 0 PPP6C    |
| 209148_at    | -0,312007 | 1,24 | 0,000787943 | 0,0214295 | 0 | 0 | 0 | 1 RXRB     |
| 223394_at    | -0,311377 | 1,24 | 0,000800862 | 0,021742  | 0 | 0 | 0 | 0 SERTAD1  |
| 210417_s_at  | -0,337631 | 1,26 | 0,000802546 | 0,0217488 | 0 | 0 | 0 | 0 PI4KB    |
| 201906_s_at  | -0,313881 | 1,24 | 0,000809027 | 0,0218855 | 0 | 0 | 0 | 1 CTDSPL   |
| 226534_at    | 0,315724  | 1,24 | 0,000810966 | 0,021899  | 1 | 1 | 0 | 0 KITLG    |
| 202111_at    | -0,3039   | 1,23 | 0,00081501  | 0,0219691 | 0 | 0 | 0 | 0 SLC4A2   |
| 208398_s_at  | 0,305208  | 1,24 | 0,000821055 | 0,0220929 | 0 | 0 | 0 | 0 TBPL1    |
| 200866_s_at  | -0,356588 | 1,28 | 0,000829552 | 0,0222821 | 0 | 0 | 0 | 0 PSAP     |
| 202778_s_at  | -0,321506 | 1,25 | 0,000834645 | 0,0223794 | 1 | 0 | 0 | 1 ZMYM2    |
| 209083_at    | -0,314765 | 1,24 | 0,000838569 | 0,0224356 | 0 | 0 | 0 | 0 CORO1A   |
| 209267_s_at  | 0,308829  | 1,24 | 0,000840762 | 0,0224356 | 2 | 0 | 0 | 0 SLC39A8  |
| 209717_at    | -0,330002 | 1,26 | 0,000843826 | 0,022467  | 1 | 0 | 0 | 1 EVI5     |
| 200752_s_at  | -0,311319 | 1,24 | 0,000851909 | 0,0225711 | 0 | 0 | 0 | 0 CAPN1    |
| 212420_at    | 0,376448  | 1,3  | 0,000856643 | 0,0225711 | 0 | 0 | 0 | 0 ELF1     |
| 203006_at    | 0,306558  | 1,24 | 0,000855609 | 0,0225711 | 1 | 0 | 0 | 0 INPP5A   |
| 225996_at    | -0,315375 | 1,24 | 0,000855166 | 0,0225711 | 2 | 1 | 2 | 0 LONRF2   |
| 203552_at    | 0,313891  | 1,24 | 0,000854537 | 0,0225711 | 0 | 0 | 0 | 0 MAP4K5   |
| 202234_s_at  | 0,332811  | 1,26 | 0,000856208 | 0,0225711 | 1 | 0 | 0 | 0 SLC16A1  |



|              |           |      |             |           |   |   |   |             |
|--------------|-----------|------|-------------|-----------|---|---|---|-------------|
| 226002_at    | -0,311287 | 1,24 | 0,000864181 | 0,0227304 | 3 | 1 | 2 | 0 GAB1      |
| 203311_s_at  | -0,347034 | 1,27 | 0,00087151  | 0,0227666 | 1 | 0 | 0 | 0 ARF6      |
| 208810_at    | 0,329567  | 1,26 | 0,000870628 | 0,0227666 | 0 | 0 | 0 | 0 DNAJB6    |
| 226749_at    | -0,328814 | 1,26 | 0,000868223 | 0,0227666 | 0 | 0 | 1 | 0 MRPS9     |
| 224907_s_at  | -0,310049 | 1,24 | 0,000871549 | 0,0227666 | 0 | 0 | 0 | 0 SH3GLB2   |
| 223894_s_at  | -0,335872 | 1,26 | 0,000879459 | 0,0229338 | 0 | 1 | 0 | 0 AKTIP     |
| 211621_at    | 0,307013  | 1,24 | 0,000884451 | 0,0230245 | 0 | 0 | 0 | 0 AR        |
| 209455_at    | -0,30369  | 1,23 | 0,000891575 | 0,0231307 | 0 | 1 | 1 | 0 FBXW11    |
| 201365_at    | -0,304193 | 1,23 | 0,000891057 | 0,0231307 | 1 | 0 | 0 | 0 OAZ2      |
| 213234_at    | 0,305352  | 1,24 | 0,000899328 | 0,0232921 | 0 | 0 | 0 | 0 KIAA1467  |
| 206500_s_at  | 0,371629  | 1,29 | 0,000910212 | 0,0235026 | 0 | 0 | 0 | 0 C14orf106 |
| 218977_s_at  | -0,309395 | 1,24 | 0,000910545 | 0,0235026 | 0 | 0 | 0 | 0 TRNAU1AP  |
| 1555920_at   | 0,340544  | 1,27 | 0,000930213 | 0,0239695 | 0 | 0 | 0 | 0 CBX3      |
| 244653_at    | -0,299444 | 1,23 | 0,000933356 | 0,0240098 | 1 | 0 | 0 | 0 SETD7     |
| 236862_at    | 0,304521  | 1,24 | 0,000945638 | 0,0242847 | 2 | 0 | 0 | 0 GOPC      |
| 1565887_at   | 0,309072  | 1,24 | 0,00095341  | 0,024443  | 1 | 0 | 0 | 0 TRPM7     |
| 228129_at    | 0,338933  | 1,26 | 0,000956984 | 0,0244933 | 3 | 0 | 0 | 0 SERBP1    |
| 210085_s_at  | -0,352282 | 1,28 | 0,000962416 | 0,0245909 | 0 | 0 | 0 | 0 ANXA9     |
| 202600_s_at  | 0,346606  | 1,27 | 0,000965992 | 0,0246409 | 1 | 0 | 0 | 0 NRIP1     |
| 229518_at    | -0,301093 | 1,23 | 0,000970889 | 0,0246664 | 0 | 0 | 0 | 0 FAM46B    |
| 234491_s_at  | 0,344132  | 1,27 | 0,00097186  | 0,0246664 | 0 | 1 | 0 | 0 SAV1      |
| 1554408_a_at | -0,330971 | 1,26 | 0,000968674 | 0,0246664 | 0 | 0 | 0 | 0 TK1       |
| 209791_at    | -0,300171 | 1,23 | 0,000980549 | 0,0248455 | 0 | 0 | 0 | 0 PAD12     |
| 218927_s_at  | -0,306945 | 1,24 | 0,000983206 | 0,0248713 | 1 | 0 | 0 | 1 CHST12    |
| 223413_s_at  | 0,362763  | 1,29 | 0,000987418 | 0,0249364 | 0 | 0 | 0 | 0 LYAR      |
| 201511_at    | -0,323628 | 1,25 | 0,000990658 | 0,0249767 | 0 | 0 | 0 | 0 AAMP      |
| 212114_at    | -0,304817 | 1,24 | 0,00103194  | 0,0258887 | 1 | 0 | 0 | 0 LOC552889 |
| 238005_s_at  | -0,312229 | 1,24 | 0,00103193  | 0,0258887 | 2 | 0 | 1 | 0 SIN3A     |
| 213618_at    | -0,322859 | 1,25 | 0,00104467  | 0,026165  | 0 | 0 | 0 | 1 ARAP2     |
| 204903_x_at  | -0,299487 | 1,23 | 0,00105365  | 0,0263465 | 0 | 0 | 0 | 0 ATG4B     |
| 201216_at    | -0,335918 | 1,26 | 0,00105825  | 0,0264179 | 0 | 0 | 0 | 0 ERP29     |
| 201853_s_at  | -0,305228 | 1,24 | 0,00107243  | 0,0266686 | 0 | 0 | 0 | 0 CDC25B    |
| 242224_at    | -0,299496 | 1,23 | 0,00107355  | 0,0266686 | 0 | 0 | 0 | 0 GPATCH2   |
| 223954_x_at  | -0,308583 | 1,24 | 0,00107186  | 0,0266686 | 0 | 0 | 0 | 0 NECAB3    |
| 201373_at    | -0,297179 | 1,23 | 0,00107957  | 0,026746  | 0 | 0 | 0 | 0 PLEC1     |
| 221609_s_at  | -0,294922 | 1,23 | 0,00108018  | 0,026746  | 0 | 0 | 0 | 0 WNT6      |
| 204643_s_at  | -0,30246  | 1,23 | 0,00108314  | 0,0267757 | 1 | 0 | 0 | 0 ENOX2     |
| 209195_s_at  | -0,309773 | 1,24 | 0,00108767  | 0,0268003 | 0 | 0 | 1 | 0 ADCY6     |
| 203628_at    | 0,361401  | 1,28 | 0,00108638  | 0,0268003 | 1 | 0 | 0 | 0 IGF1R     |
| 200707_at    | -0,303057 | 1,23 | 0,00109971  | 0,0270533 | 0 | 0 | 0 | 0 PRKCSH    |
| 202342_s_at  | -0,308027 | 1,24 | 0,00110634  | 0,0271724 | 2 | 1 | 0 | 1 TRIM2     |
| 225663_at    | 0,307031  | 1,24 | 0,0011122   | 0,0272002 | 2 | 0 | 0 | 0 ACBD5     |
| 202923_s_at  | -0,299905 | 1,23 | 0,00110998  | 0,0272002 | 1 | 1 | 1 | 0 GCLC      |
| 226353_at    | -0,303419 | 1,23 | 0,00111284  | 0,0272002 | 0 | 0 | 0 | 0 SPPL2A    |
| 1552256_a_at | -0,295026 | 1,23 | 0,00111908  | 0,0273088 | 0 | 0 | 0 | 0 SCARB1    |
| 207719_x_at  | 0,3217    | 1,25 | 0,00112424  | 0,0273908 | 0 | 1 | 0 | 0 CEP170    |
| 218050_at    | 0,346507  | 1,27 | 0,00112618  | 0,0273941 | 1 | 0 | 0 | 0 UFM1      |
| 222955_s_at  | -0,320955 | 1,25 | 0,00112892  | 0,0274168 | 0 | 0 | 0 | 0 FAM45A    |
| 225974_at    | 0,334465  | 1,26 | 0,00113298  | 0,0274716 | 0 | 0 | 1 | 0 TMEM64    |
| 231875_at    | 0,364236  | 1,29 | 0,00113673  | 0,0275187 | 0 | 0 | 0 | 0 KIF21A    |
| 222664_at    | -0,302633 | 1,23 | 0,00114456  | 0,0276642 | 0 | 0 | 0 | 0 KCTD15    |
| 200751_s_at  | -0,326247 | 1,25 | 0,00116746  | 0,0280098 | 1 | 0 | 0 | 0 HNRNPC    |
| 209184_s_at  | 0,315631  | 1,24 | 0,00116807  | 0,0280098 | 0 | 0 | 0 | 0 IRS2      |
| 201490_s_at  | -0,355157 | 1,28 | 0,00116614  | 0,0280098 | 1 | 0 | 0 | 0 PPIF      |
| 207782_s_at  | -0,321155 | 1,25 | 0,00116708  | 0,0280098 | 0 | 0 | 1 | 0 PSEN1     |
| 208827_at    | -0,304619 | 1,24 | 0,00116295  | 0,0280098 | 0 | 0 | 0 | 0 PSMB6     |
| 216422_at    | 0,307514  | 1,24 | 0,00117345  | 0,0280944 | 0 | 0 | 0 | 0 PA2G4     |
| 202905_x_at  | 0,411388  | 1,33 | 0,00118402  | 0,028303  | 0 | 1 | 0 | 0 NBN       |
| 204798_at    | 0,311334  | 1,24 | 0,00119229  | 0,0284558 | 0 | 1 | 0 | 0 MYB       |
| 208374_s_at  | -0,311954 | 1,24 | 0,00119928  | 0,0285159 | 2 | 0 | 1 | 0 CAPZA1    |
| 216389_s_at  | -0,309249 | 1,24 | 0,00119769  | 0,0285159 | 0 | 0 | 0 | 0 WDR23     |
| 200641_s_at  | -0,314673 | 1,24 | 0,00120043  | 0,0285159 | 1 | 0 | 0 | 0 YWHAZ     |
| 200816_s_at  | -0,301145 | 1,23 | 0,00120787  | 0,0286478 | 1 | 1 | 2 | 0 PAFAH1B1  |
| 209308_s_at  | -0,304644 | 1,24 | 0,00122982  | 0,0291229 | 0 | 1 | 0 | 0 BNIP2     |
| 212430_at    | -0,297804 | 1,23 | 0,00123334  | 0,0291609 | 0 | 0 | 0 | 0 RBM38     |
| 213216_at    | -0,292636 | 1,22 | 0,00123847  | 0,0291913 | 1 | 0 | 0 | 1 OTUD3     |
| 213372_at    | 0,344038  | 1,27 | 0,00123713  | 0,0291913 | 2 | 0 | 0 | 0 PAQR3     |
| 202522_at    | -0,307126 | 1,24 | 0,00124526  | 0,0292677 | 0 | 0 | 0 | 1 PITPNB    |
| 214305_s_at  | 0,421374  | 1,34 | 0,00124556  | 0,0292677 | 0 | 0 | 0 | 0 SF3B1     |
| 218108_at    | -0,296162 | 1,23 | 0,0012562   | 0,0294723 | 0 | 0 | 0 | 1 UBR7      |

|              |           |      |            |           |   |   |   |   |          |
|--------------|-----------|------|------------|-----------|---|---|---|---|----------|
| 219768_at    | -0,297496 | 1,23 | 0,00127131 | 0,029735  | 0 | 0 | 0 | 0 | VTCN1    |
| 237052_x_at  | 0,294323  | 1,23 | 0,00128463 | 0,0300004 | 1 | 0 | 0 | 0 | GIGYF2   |
| 1554678_s_at | -0,32578  | 1,25 | 0,00129031 | 0,0300458 | 0 | 0 | 0 | 0 | HNRPD1   |
| 217943_s_at  | -0,313424 | 1,24 | 0,00129053 | 0,0300458 | 0 | 1 | 0 | 0 | MAP7D1   |
| 204179_at    | -0,296697 | 1,23 | 0,00129784 | 0,030136  | 0 | 0 | 0 | 0 | MB       |
| 209333_at    | -0,2934   | 1,23 | 0,00129837 | 0,030136  | 0 | 0 | 0 | 0 | ULK1     |
| 205019_s_at  | -0,295122 | 1,23 | 0,00130329 | 0,0302042 | 0 | 0 | 0 | 0 | VIPR1    |
| 200914_x_at  | 0,382933  | 1,3  | 0,00130694 | 0,0302427 | 0 | 0 | 0 | 0 | KTN1     |
| 225431_x_at  | 0,318073  | 1,25 | 0,00131254 | 0,0303261 | 0 | 0 | 0 | 0 | PM20D2   |
| 240633_at    | -0,293423 | 1,23 | 0,00132041 | 0,0304617 | 0 | 0 | 0 | 0 | DOK7     |
| 208744_x_at  | 0,344601  | 1,27 | 0,00132542 | 0,0305309 | 0 | 0 | 0 | 0 | HSPH1    |
| 214769_at    | -0,293981 | 1,23 | 0,00133342 | 0,0306224 | 1 | 0 | 0 | 0 | CLCN4    |
| 1567080_s_at | -0,325029 | 1,25 | 0,00133301 | 0,0306224 | 1 | 0 | 0 | 0 | CLN6     |
| 206724_at    | -0,297132 | 1,23 | 0,00134768 | 0,0308517 | 0 | 1 | 0 | 0 | CBX4     |
| 212776_s_at  | -0,325196 | 1,25 | 0,00135153 | 0,0308517 | 0 | 0 | 0 | 0 | OBSL1    |
| 204795_at    | -0,295901 | 1,23 | 0,0013496  | 0,0308517 | 1 | 0 | 1 | 0 | PRR3     |
| 202786_at    | 0,304446  | 1,23 | 0,00136459 | 0,0310567 | 0 | 0 | 0 | 0 | STK39    |
| 201251_at    | -0,309635 | 1,24 | 0,00136983 | 0,0311293 | 0 | 0 | 0 | 0 | PKM2     |
| 215245_x_at  | 0,330911  | 1,26 | 0,00137628 | 0,0311364 | 0 | 1 | 0 | 0 | FMR1     |
| 202275_at    | -0,289204 | 1,22 | 0,00137555 | 0,0311364 | 0 | 0 | 0 | 0 | G6PD     |
| 227627_at    | 0,298085  | 1,23 | 0,00137314 | 0,0311364 | 0 | 2 | 0 | 0 | SGK3     |
| 212298_at    | -0,290808 | 1,22 | 0,00138596 | 0,0312622 | 1 | 0 | 0 | 0 | NRP1     |
| 203067_at    | -0,298912 | 1,23 | 0,00138577 | 0,0312622 | 0 | 0 | 0 | 0 | PDHX     |
| 201291_s_at  | 0,502478  | 1,42 | 0,0013898  | 0,0313025 | 1 | 0 | 0 | 0 | TOP2A    |
| 220232_at    | 0,330621  | 1,26 | 0,0013954  | 0,031382  | 1 | 0 | 0 | 0 | SCD5     |
| 214001_x_at  | 0,431801  | 1,35 | 0,00141418 | 0,0317574 | 0 | 0 | 0 | 0 | RPS10    |
| 226331_at    | -0,290383 | 1,22 | 0,00142514 | 0,0319219 | 2 | 4 | 1 | 0 | BBX      |
| 1555730_a_at | -0,325841 | 1,25 | 0,0014257  | 0,0319219 | 0 | 0 | 0 | 0 | CFL1     |
| 214021_x_at  | 0,33732   | 1,26 | 0,00147503 | 0,0329126 | 0 | 0 | 0 | 0 | ITGB5    |
| 212686_at    | -0,294834 | 1,23 | 0,00147644 | 0,0329126 | 3 | 0 | 0 | 0 | PPM1H    |
| 208997_s_at  | -0,329685 | 1,26 | 0,00147389 | 0,0329126 | 0 | 0 | 0 | 0 | UCP2     |
| 200842_s_at  | 0,427125  | 1,34 | 0,00148533 | 0,0330386 | 0 | 0 | 0 | 0 | EPRS     |
| 218665_at    | -0,288842 | 1,22 | 0,00148644 | 0,0330386 | 2 | 0 | 0 | 0 | FZD4     |
| 225929_s_at  | -0,286679 | 1,22 | 0,00148948 | 0,0330577 | 0 | 0 | 1 | 0 | RNF213   |
| 224583_at    | -0,309542 | 1,24 | 0,00149584 | 0,0331023 | 0 | 0 | 0 | 0 | COTL1    |
| 227166_at    | -0,287916 | 1,22 | 0,00149454 | 0,0331023 | 0 | 0 | 0 | 0 | DNAJC18  |
| 227747_at    | 0,292954  | 1,23 | 0,00149876 | 0,0331187 | 0 | 0 | 0 | 0 | MPZL3    |
| 211450_s_at  | -0,322973 | 1,25 | 0,00151277 | 0,033283  | 0 | 0 | 0 | 0 | MSH6     |
| 204360_s_at  | -0,30284  | 1,23 | 0,00151177 | 0,033283  | 0 | 0 | 1 | 0 | NAGLU    |
| 217811_at    | -0,337124 | 1,26 | 0,00150906 | 0,033283  | 2 | 2 | 0 | 0 | SELT     |
| 212277_at    | -0,302506 | 1,23 | 0,00152859 | 0,0334858 | 0 | 0 | 2 | 0 | MTMR4    |
| 225005_at    | -0,285774 | 1,22 | 0,00152661 | 0,0334858 | 0 | 0 | 0 | 0 | PHF13    |
| 225203_at    | -0,289114 | 1,22 | 0,001569   | 0,0343215 | 0 | 1 | 0 | 0 | PPP1R16A |
| 204401_at    | -0,289729 | 1,22 | 0,001577   | 0,0344471 | 0 | 0 | 0 | 0 | KCNN4    |
| 226711_at    | 0,300838  | 1,23 | 0,00160967 | 0,03506   | 0 | 0 | 0 | 0 | FOXN2    |
| 212085_at    | -0,318821 | 1,25 | 0,00160767 | 0,03506   | 0 | 0 | 0 | 0 | SLC25A6  |
| 229757_at    | 0,292104  | 1,22 | 0,00162447 | 0,0353317 | 1 | 0 | 0 | 0 | NAF1     |
| 232053_x_at  | -0,32146  | 1,25 | 0,00163888 | 0,0355941 | 0 | 0 | 0 | 0 | RHBDD2   |
| 203415_at    | -0,328443 | 1,26 | 0,00164269 | 0,0356259 | 0 | 0 | 0 | 0 | PDCD6    |
| 218859_s_at  | 0,374068  | 1,3  | 0,00165188 | 0,0357361 | 0 | 0 | 0 | 0 | ESF1     |
| 1554026_a_at | -0,29302  | 1,23 | 0,00165247 | 0,0357361 | 1 | 1 | 0 | 0 | MYO10    |
| 232164_s_at  | -0,290018 | 1,22 | 0,00166932 | 0,0359637 | 0 | 0 | 0 | 0 | EPPK1    |
| 226566_at    | -0,286297 | 1,22 | 0,00167009 | 0,0359637 | 0 | 0 | 1 | 0 | TRIM11   |
| 230836_at    | 0,295357  | 1,23 | 0,00168167 | 0,0361618 | 2 | 0 | 0 | 0 | ST8SIA4  |
| 208711_s_at  | 0,382056  | 1,3  | 0,00168748 | 0,0361845 | 0 | 0 | 0 | 0 | CCND1    |
| 209666_s_at  | 0,310199  | 1,24 | 0,00168535 | 0,0361845 | 0 | 0 | 0 | 0 | CHUK     |
| 201602_s_at  | 0,327077  | 1,25 | 0,00172176 | 0,0368155 | 1 | 1 | 0 | 0 | PPP1R12A |
| 226181_at    | 0,31998   | 1,25 | 0,00173444 | 0,0370348 | 0 | 0 | 0 | 0 | TUBE1    |
| 231370_at    | 0,319866  | 1,25 | 0,00175784 | 0,0374818 | 3 | 1 | 1 | 0 | PPM1A    |
| 233500_x_at  | -0,289257 | 1,22 | 0,00177096 | 0,0377086 | 0 | 0 | 0 | 0 | CLEC2D   |
| 219906_at    | -0,283012 | 1,22 | 0,00178335 | 0,0377608 | 0 | 0 | 0 | 0 | FLJ10213 |
| 202525_at    | -0,304654 | 1,24 | 0,00178052 | 0,0377608 | 0 | 0 | 0 | 0 | PRSS8    |
| 204658_at    | -0,296485 | 1,23 | 0,00178067 | 0,0377608 | 0 | 1 | 0 | 0 | TRA2A    |
| 223017_at    | -0,295182 | 1,23 | 0,00178159 | 0,0377608 | 1 | 0 | 0 | 0 | TXNDC12  |
| 231764_at    | -0,284072 | 1,22 | 0,00178643 | 0,0377733 | 3 | 1 | 0 | 0 | CHRAC1   |
| 200799_at    | 0,297208  | 1,23 | 0,00180127 | 0,0380343 | 0 | 0 | 0 | 0 | HSPA1A   |
| 1553743_at   | 0,282526  | 1,22 | 0,00181699 | 0,0382785 | 0 | 1 | 0 | 0 | FAM119A  |
| 203621_at    | -0,2916   | 1,22 | 0,00181787 | 0,0382785 | 1 | 0 | 0 | 0 | NDUFB5   |
| 202324_s_at  | 0,292961  | 1,23 | 0,00182657 | 0,0384086 | 1 | 1 | 0 | 0 | ACBD3    |
| 228477_at    | 0,296583  | 1,23 | 0,0018292  | 0,0384106 | 1 | 0 | 0 | 0 | ARGLU1   |

|              |           |      |            |           |   |   |   |   |           |       |
|--------------|-----------|------|------------|-----------|---|---|---|---|-----------|-------|
| 201028_s_at  | -0,313062 | 1,24 | 0,00186616 | 0,0391327 | 0 | 0 | 0 | 0 | CD99      |       |
| 204326_x_at  | -0,290171 | 1,22 | 0,00186999 | 0,0391564 | 0 | 0 | 0 | 0 | MT1X      |       |
| 203870_at    | -0,295776 | 1,23 | 0,00187244 | 0,0391564 | 1 | 1 | 0 | 0 | USP46     |       |
| 213036_x_at  | -0,291155 | 1,22 | 0,00192348 | 0,0401133 | 0 | 0 | 0 | 0 | ATP2A3    |       |
| 210978_s_at  | -0,337561 | 1,26 | 0,00192291 | 0,0401133 | 0 | 0 | 0 | 0 | TAGLN2    |       |
| 214815_at    | 0,333386  | 1,26 | 0,00192851 | 0,0401631 | 0 | 1 | 0 | 0 | TRIM33    |       |
| 1555874_x_at | -0,279098 | 1,21 | 0,00193317 | 0,0402051 | 0 | 1 | 0 | 0 | MGC21881  |       |
| 225287_s_at  | -0,293726 | 1,23 | 0,00196491 | 0,0408094 | 0 | 0 | 0 | 0 | TMEM55B   |       |
| 202528_at    | -0,281787 | 1,22 | 0,0019757  | 0,0409776 | 0 | 0 | 0 | 0 | GALE      |       |
| 221846_s_at  | -0,285945 | 1,22 | 0,00200564 | 0,0415418 | 0 | 0 | 0 | 0 | CASKIN2   |       |
| 224325_at    | 0,284386  | 1,22 | 0,00201111 | 0,0415986 | 0 | 0 | 0 | 0 | FZD8      |       |
| 210074_at    | -0,298482 | 1,23 | 0,00201996 | 0,0417249 | 0 | 0 | 0 | 0 | CTSL2     |       |
| 225272_at    | -0,290478 | 1,22 | 0,0020233  | 0,0417371 | 0 | 0 | 0 | 0 | SAT2      |       |
| 206463_s_at  | -0,288871 | 1,22 | 0,00202747 | 0,0417664 | 0 | 0 | 0 | 0 | DHRS2     |       |
| 217772_s_at  | -0,292609 | 1,22 | 0,00205166 | 0,0419218 | 0 | 0 | 0 | 0 | MTCH2     |       |
| 202290_at    | -0,314708 | 1,24 | 0,00204977 | 0,0419218 | 1 | 0 | 0 | 0 | PDAP1     |       |
| 225040_s_at  | 0,287193  | 1,22 | 0,00204243 | 0,0419218 | 1 | 0 | 0 | 0 | RPE       |       |
| 201646_at    | -0,286067 | 1,22 | 0,00203802 | 0,0419218 | 0 | 2 | 0 | 0 | SCARB2    |       |
| 203164_at    | -0,277782 | 1,21 | 0,00205432 | 0,0419218 | 0 | 0 | 0 | 0 | SLC33A1   |       |
| 202826_at    | -0,279929 | 1,21 | 0,00204946 | 0,0419218 | 0 | 0 | 0 | 0 | SPINT1    |       |
| 212340_at    | 0,281159  | 1,22 | 0,00205229 | 0,0419218 | 0 | 0 | 0 | 0 | YIPF6     |       |
| 208837_at    | -0,301617 | 1,23 | 0,0020777  | 0,0423422 | 0 | 0 | 0 | 0 | TMED3     |       |
| 217813_s_at  | 0,344187  | 1,27 | 0,00208484 | 0,042374  | 1 | 0 | 0 | 0 | SPIN1     |       |
| 204011_at    | 0,276143  | 1,21 | 0,00208398 | 0,042374  | 0 | 0 | 0 | 0 | SPRY2     |       |
| 206833_s_at  | -0,281482 | 1,22 | 0,00211251 | 0,0428792 | 1 | 1 | 0 | 0 | ACYP2     |       |
| 209884_s_at  | 0,300879  | 1,23 | 0,00213186 | 0,0432143 | 0 | 0 | 0 | 0 | SLC4A7    |       |
| 218987_at    | -0,291041 | 1,22 | 0,00213622 | 0,0432306 | 0 | 0 | 0 | 0 | ATF7IP    |       |
| 205093_at    | -0,279226 | 1,21 | 0,00213836 | 0,0432306 | 1 | 0 | 0 | 0 | PLEKHA6   |       |
| 203453_at    | -0,279287 | 1,21 | 0,00214993 | 0,0434069 | 0 | 0 | 0 | 0 | SCNN1A    |       |
| 215489_x_at  | -0,303592 | 1,23 | 0,00216415 | 0,0436361 | 0 | 0 | 0 | 0 | HOMER3    |       |
| 210678_s_at  | -0,283978 | 1,22 | 0,00217632 | 0,0437653 | 0 | 0 | 0 | 0 | AGPAT2    |       |
| 228846_at    | -0,304955 | 1,24 | 0,00217378 | 0,0437653 | 1 | 1 | 1 | 0 | MXD1      |       |
| 208699_x_at  | -0,326364 | 1,25 | 0,00219892 | 0,0441615 | 0 | 0 | 0 | 0 | TKT       |       |
| 219382_at    | -0,280329 | 1,21 | 0,00220922 | 0,0442514 | 0 | 0 | 0 | 0 | SERTAD3   |       |
| 225294_s_at  | -0,290394 | 1,22 | 0,0022088  | 0,0442514 | 0 | 0 | 0 | 0 | TRAPPC1   |       |
| 229466_at    | -0,275564 | 1,21 | 0,00221481 | 0,0443049 | 2 | 0 | 0 | 0 | TRIM66    |       |
| 218000_s_at  | -0,285049 | 1,22 | 0,00222701 | 0,0444905 | 0 | 0 | 0 | 0 | PHLDA1    |       |
| 1558142_at   | -0,284603 | 1,22 | 0,0022368  | 0,0446274 | 3 | 0 | 0 | 0 | TNRC6B    |       |
| 202135_s_at  | -0,283354 | 1,22 | 0,00224477 | 0,0447278 | 0 | 0 | 0 | 0 | ACTR1B    |       |
| 224646_x_at  | -0,273389 | 1,21 | 0,00225606 | 0,0448938 | 0 | 0 | 0 | 0 | H19       |       |
| 225211_at    | -0,279513 | 1,21 | 0,00226206 | 0,0449543 | 0 | 1 | 0 | 0 | PVRL1     |       |
| 228544_s_at  | -0,291266 | 1,22 | 0,00229045 | 0,0453775 | 0 | 0 | 0 | 0 | CSRP2BP   |       |
| 1555878_at   | 0,280275  | 1,21 | 0,00229206 | 0,0453775 | 1 | 0 | 0 | 0 | RPS24     |       |
| 235390_at    | -0,275119 | 1,21 | 0,0022923  | 0,0453775 | 1 | 2 | 2 | 0 | SFRS12IP1 |       |
| 204258_at    | 0,294982  | 1,23 | 0,00229732 | 0,0454176 | 0 | 0 | 0 | 0 | CHD1      |       |
| 201504_s_at  | -0,307314 | 1,24 | 0,00230592 | 0,0455284 | 2 | 1 | 0 | 0 | TSN       |       |
| 225438_at    | 0,281345  | 1,22 | 0,00230965 | 0,0455429 | 0 | 1 | 0 | 0 | NUDCD1    |       |
| 200663_at    | -0,275221 | 1,21 | 0,00233117 | 0,0459077 | 0 | 0 | 0 | 0 | CD63      |       |
| 231870_s_at  | 0,288683  | 1,22 | 0,0023542  | 0,0463012 | 0 | 0 | 0 | 0 | NMD3      |       |
| 235024_at    | -0,273853 | 1,21 | 0,00236064 | 0,046368  | 0 | 0 | 0 | 0 | PHF17     |       |
| 207011_s_at  | -0,272168 | 1,21 | 0,0023668  | 0,0464291 | 0 | 0 | 0 | 0 | PTK7      |       |
| 226939_at    | -0,286818 | 1,22 | 0,00237258 | 0,0464824 | 3 | 0 | 0 | 0 | 1         | CPEB2 |
| 201473_at    | -0,275505 | 1,21 | 0,00238803 | 0,046682  | 0 | 0 | 1 | 0 | JUNB      |       |
| 203476_at    | 0,284305  | 1,22 | 0,00238891 | 0,046682  | 1 | 0 | 0 | 0 | TPBG      |       |
| 207559_s_at  | -0,287252 | 1,22 | 0,00240125 | 0,0468629 | 0 | 0 | 0 | 0 | ZMYM3     |       |
| 209433_s_at  | 0,290496  | 1,22 | 0,00241144 | 0,0470013 | 2 | 0 | 0 | 0 | PPAT      |       |
| 218770_s_at  | -0,276792 | 1,21 | 0,0024261  | 0,0472174 | 0 | 0 | 1 | 0 | TMEM39B   |       |
| 219005_at    | -0,285038 | 1,22 | 0,00242873 | 0,0472174 | 0 | 0 | 0 | 0 | TMEM59L   |       |
| 219314_s_at  | -0,274988 | 1,21 | 0,0024353  | 0,0472846 | 0 | 0 | 0 | 0 | ZNF219    |       |
| 63825_at     | 0,297923  | 1,23 | 0,00245524 | 0,0476109 | 0 | 0 | 0 | 0 | ABHD2     |       |
| 225679_at    | -0,280971 | 1,22 | 0,00246728 | 0,0477835 | 0 | 1 | 0 | 0 | NAT12     |       |
| 208668_x_at  | -0,280455 | 1,21 | 0,0024816  | 0,0479996 | 1 | 0 | 0 | 0 | HMG2      |       |
| 209699_x_at  | -0,276079 | 1,21 | 0,00248782 | 0,048059  | 0 | 0 | 0 | 0 | AKR1C2    |       |
| 227192_at    | -0,2712   | 1,21 | 0,00250188 | 0,0480898 | 0 | 0 | 0 | 0 | PRRT2     |       |
| 218360_at    | -0,29009  | 1,22 | 0,0024969  | 0,0480898 | 1 | 2 | 1 | 0 | RAB22A    |       |
| 218035_s_at  | 0,301319  | 1,23 | 0,00249346 | 0,0480898 | 0 | 1 | 0 | 0 | RBM47     |       |
| 228038_at    | -0,271136 | 1,21 | 0,00250524 | 0,0480898 | 2 | 0 | 0 | 0 | SOX2      |       |
| 223245_at    | 0,282957  | 1,22 | 0,0025022  | 0,0480898 | 0 | 0 | 0 | 0 | STRBP     |       |
| 208791_at    | -0,300691 | 1,23 | 0,00251709 | 0,0481957 | 0 | 0 | 0 | 0 | CLU       |       |
| 200644_at    | -0,274043 | 1,21 | 0,00251669 | 0,0481957 | 0 | 1 | 0 | 0 | MARCKSL1  |       |

|              |           |      |            |           |   |   |   |   |          |
|--------------|-----------|------|------------|-----------|---|---|---|---|----------|
| 215450_at    | 0,404668  | 1,32 | 0,00252279 | 0,048244  | 0 | 0 | 0 | 0 | SNRPE    |
| 222986_s_at  | -0,273074 | 1,21 | 0,00252962 | 0,0483137 | 1 | 0 | 0 | 0 | SHISA5   |
| 229126_at    | -0,28829  | 1,22 | 0,00254556 | 0,0485572 | 2 | 1 | 0 | 0 | TMEM19   |
| 223467_at    | 0,277024  | 1,21 | 0,00255537 | 0,0486833 | 1 | 0 | 0 | 0 | RASD1    |
| 203446_s_at  | 0,272022  | 1,21 | 0,00255863 | 0,0486845 | 1 | 0 | 0 | 0 | OCRL     |
| 201704_at    | -0,277029 | 1,21 | 0,00258177 | 0,0489409 | 1 | 0 | 0 | 0 | ENTPD6   |
| 221809_at    | -0,272148 | 1,21 | 0,0025785  | 0,0489409 | 0 | 0 | 0 | 0 | RANBP10  |
| 223117_s_at  | -0,273545 | 1,21 | 0,0025811  | 0,0489409 | 1 | 1 | 0 | 1 | USP47    |
| 220261_s_at  | -0,292974 | 1,23 | 0,00261032 | 0,0494205 | 0 | 0 | 0 | 0 | ZDHHC4   |
| 203005_at    | -0,281766 | 1,22 | 0,00264317 | 0,0499803 | 0 | 0 | 0 | 0 | LTBR     |
| 226952_at    | -0,278352 | 1,21 | 0,00266419 | 0,0503152 | 0 | 1 | 1 | 0 | EAF1     |
| 202729_s_at  | -0,283143 | 1,22 | 0,0026738  | 0,0504339 | 1 | 0 | 0 | 0 | LTBP1    |
| 216274_s_at  | -0,313573 | 1,24 | 0,00269907 | 0,0508476 | 0 | 0 | 0 | 0 | SEC11A   |
| 204202_at    | -0,270227 | 1,21 | 0,00270515 | 0,0508991 | 0 | 0 | 0 | 0 | IQCE     |
| 204546_at    | -0,273974 | 1,21 | 0,00271603 | 0,0510405 | 1 | 0 | 0 | 0 | KIAA0513 |
| 200695_at    | -0,28449  | 1,22 | 0,00273029 | 0,0512453 | 0 | 0 | 0 | 0 | PPP2R1A  |
| 1565162_s_at | -0,302556 | 1,23 | 0,00274506 | 0,0514589 | 0 | 0 | 0 | 0 | MGST1    |
| 238677_at    | 0,273582  | 1,21 | 0,00276596 | 0,0517868 | 0 | 0 | 1 | 0 | WDR36    |
| 228671_at    | -0,268366 | 1,2  | 0,00277216 | 0,0518391 | 0 | 0 | 0 | 0 | TMEM201  |
| 218064_s_at  | -0,298283 | 1,23 | 0,00280592 | 0,0523998 | 0 | 0 | 0 | 0 | AKAP8L   |
| 229650_s_at  | -0,294942 | 1,23 | 0,00280915 | 0,0523998 | 0 | 0 | 0 | 0 | C19orf42 |
| 203391_at    | -0,289347 | 1,22 | 0,00281593 | 0,0523998 | 0 | 0 | 0 | 0 | FKBP2    |
| 226942_at    | -0,267668 | 1,2  | 0,00281296 | 0,0523998 | 1 | 0 | 0 | 1 | PHF20L1  |
| 226850_at    | -0,271525 | 1,21 | 0,00281994 | 0,0524102 | 1 | 0 | 0 | 0 | SUMF1    |
| 230960_at    | -0,270673 | 1,21 | 0,00282657 | 0,0524692 | 1 | 0 | 0 | 0 | IGDCC3   |
| 231876_at    | -0,269549 | 1,21 | 0,00283787 | 0,0526149 | 0 | 0 | 0 | 0 | TRIM56   |
| 228408_s_at  | 0,347893  | 1,27 | 0,00284675 | 0,0527152 | 0 | 0 | 0 | 0 | SDAD1    |
| 218596_at    | -0,272027 | 1,21 | 0,00286189 | 0,0529311 | 0 | 0 | 0 | 0 | TBC1D13  |
| 203256_at    | -0,274152 | 1,21 | 0,00288896 | 0,0533668 | 0 | 0 | 0 | 0 | CDH3     |
| 208729_x_at  | -0,292782 | 1,23 | 0,00292403 | 0,0539491 | 0 | 0 | 0 | 0 | HLA-B    |
| 207243_s_at  | -0,274367 | 1,21 | 0,00293409 | 0,054008  | 2 | 0 | 0 | 0 | CALM2    |
| 213175_s_at  | -0,299687 | 1,23 | 0,00293433 | 0,054008  | 0 | 0 | 0 | 0 | SNRPB    |
| 226123_at    | 0,34288   | 1,27 | 0,00295159 | 0,0540463 | 1 | 0 | 0 | 0 | CHD7     |
| 206015_s_at  | -0,271311 | 1,21 | 0,00295338 | 0,0540463 | 0 | 0 | 0 | 0 | FOXJ3    |
| 212890_at    | -0,269175 | 1,21 | 0,00295419 | 0,0540463 | 1 | 0 | 0 | 0 | SLC38A10 |
| 209607_x_at  | -0,288963 | 1,22 | 0,00295188 | 0,0540463 | 0 | 0 | 0 | 0 | SULT1A3  |
| 224445_s_at  | -0,290021 | 1,22 | 0,00296132 | 0,0541117 | 0 | 0 | 0 | 0 | ZFYVE21  |
| 229317_at    | 0,276837  | 1,21 | 0,00296851 | 0,0541612 | 1 | 0 | 0 | 0 | KPNA5    |
| 201827_at    | -0,275468 | 1,21 | 0,00297116 | 0,0541612 | 0 | 0 | 0 | 0 | SMARCD2  |
| 221538_s_at  | -0,2742   | 1,21 | 0,00298314 | 0,0543146 | 1 | 0 | 0 | 1 | PLXNA1   |
| 232269_x_at  | -0,283655 | 1,22 | 0,00300899 | 0,0547197 | 0 | 0 | 0 | 0 | METRNL   |
| 225174_at    | -0,284857 | 1,22 | 0,00301491 | 0,0547619 | 1 | 2 | 0 | 0 | DNAJC10  |
| 212708_at    | -0,272548 | 1,21 | 0,0030236  | 0,0548541 | 0 | 0 | 0 | 0 | MSL1     |
| 213397_x_at  | 0,271185  | 1,21 | 0,00303536 | 0,0549364 | 0 | 0 | 0 | 0 | ANG      |
| 209111_at    | -0,269441 | 1,21 | 0,00303459 | 0,0549364 | 0 | 0 | 0 | 0 | RNF5     |
| 222633_at    | 0,344911  | 1,27 | 0,00307116 | 0,0553866 | 2 | 2 | 0 | 0 | TBL1XR1  |
| 208677_s_at  | -0,290665 | 1,22 | 0,00309396 | 0,0557315 | 0 | 0 | 0 | 0 | BSG      |
| 226005_at    | -0,272911 | 1,21 | 0,00310384 | 0,0558433 | 1 | 1 | 1 | 0 | UBE2G1   |
| 203497_at    | 0,297319  | 1,23 | 0,00311085 | 0,0559034 | 0 | 1 | 0 | 0 | MED1     |
| 202993_at    | -0,284003 | 1,22 | 0,00315805 | 0,0566643 | 0 | 0 | 0 | 0 | ILVBL    |
| 235309_at    | 0,267849  | 1,2  | 0,00316065 | 0,0566643 | 0 | 0 | 0 | 0 | RPS15A   |
| 204247_s_at  | -0,27418  | 1,21 | 0,00317589 | 0,0568705 | 0 | 0 | 0 | 0 | CDK5     |
| 224474_x_at  | -0,266384 | 1,2  | 0,00318087 | 0,0568927 | 0 | 0 | 0 | 0 | SMEK2    |
| 217849_s_at  | -0,266514 | 1,2  | 0,0031927  | 0,0569852 | 1 | 0 | 0 | 0 | CDC42BPB |
| 212193_s_at  | -0,274713 | 1,21 | 0,00319354 | 0,0569852 | 0 | 0 | 0 | 1 | LARP1    |
| 208598_s_at  | -0,274947 | 1,21 | 0,00320075 | 0,0569932 | 0 | 0 | 0 | 0 | HUWE1    |
| 205037_at    | -0,268301 | 1,2  | 0,00320149 | 0,0569932 | 0 | 0 | 0 | 0 | RABL4    |
| 200001_at    | -0,27582  | 1,21 | 0,00323025 | 0,0574063 | 0 | 0 | 0 | 0 | CAPNS1   |
| 218893_at    | -0,269138 | 1,21 | 0,0032332  | 0,0574063 | 0 | 0 | 0 | 0 | ISOC2    |
| 202071_at    | -0,275019 | 1,21 | 0,00323602 | 0,0574063 | 1 | 1 | 0 | 0 | SDC4     |
| 1555037_a_at | -0,270187 | 1,21 | 0,0032435  | 0,0574719 | 1 | 0 | 0 | 0 | IDH1     |
| 201872_s_at  | 0,268468  | 1,2  | 0,00324951 | 0,0575114 | 0 | 0 | 0 | 0 | ABCE1    |
| 204417_at    | -0,267702 | 1,2  | 0,00325745 | 0,057585  | 0 | 0 | 1 | 0 | GALC     |
| 226306_at    | -0,266778 | 1,2  | 0,00327483 | 0,0576034 | 0 | 0 | 0 | 0 | C6orf1   |
| 223721_s_at  | -0,308425 | 1,24 | 0,00327995 | 0,0576034 | 1 | 0 | 0 | 0 | DNAJC12  |
| 214091_s_at  | -0,293551 | 1,23 | 0,00328123 | 0,0576034 | 0 | 0 | 0 | 0 | GPX3     |
| 218164_at    | -0,26965  | 1,21 | 0,00326648 | 0,0576034 | 0 | 0 | 0 | 0 | SPATA20  |
| 203615_x_at  | -0,283843 | 1,22 | 0,00327167 | 0,0576034 | 0 | 0 | 0 | 0 | SULT1A1  |
| 216609_at    | 0,344039  | 1,27 | 0,00327334 | 0,0576034 | 0 | 0 | 0 | 0 | TXN      |
| 225913_at    | -0,266328 | 1,2  | 0,00329546 | 0,0577198 | 2 | 1 | 1 | 0 | SGK269   |

|              |           |      |            |           |   |   |   |             |
|--------------|-----------|------|------------|-----------|---|---|---|-------------|
| 202477_s_at  | -0,275327 | 1,21 | 0,00329351 | 0,0577198 | 0 | 0 | 0 | 0 TUBGCP2   |
| 203254_s_at  | -0,271393 | 1,21 | 0,00331177 | 0,0579389 | 0 | 0 | 0 | 0 TLN1      |
| 230006_s_at  | -0,274089 | 1,21 | 0,00332747 | 0,0581466 | 0 | 0 | 0 | 1 SVIP      |
| 208003_s_at  | 0,302657  | 1,23 | 0,00333558 | 0,0582215 | 2 | 0 | 1 | 0 FAM15     |
| 201508_at    | 0,265575  | 1,2  | 0,00336442 | 0,0585962 | 0 | 0 | 0 | 0 IGFBP4    |
| 207480_s_at  | -0,267899 | 1,2  | 0,00336476 | 0,0585962 | 0 | 2 | 0 | 0 MEIS2     |
| 227359_at    | -0,263977 | 1,2  | 0,00337998 | 0,0587938 | 0 | 0 | 0 | 0 C1orf102  |
| 226303_at    | -0,266722 | 1,2  | 0,00338644 | 0,0588389 | 0 | 0 | 0 | 0 PGM5      |
| 226568_at    | 0,261814  | 1,2  | 0,00339381 | 0,0588997 | 1 | 0 | 1 | 0 FAM102B   |
| 225153_at    | 0,272615  | 1,21 | 0,00341245 | 0,0591556 | 1 | 0 | 0 | 0 GFM1      |
| 203343_at    | 0,289005  | 1,22 | 0,00342016 | 0,0592217 | 1 | 0 | 0 | 0 UGDH      |
| 202271_at    | -0,278581 | 1,21 | 0,00343614 | 0,0593632 | 2 | 0 | 0 | 0 FBXO28    |
| 211074_at    | -0,268068 | 1,2  | 0,0034548  | 0,0595502 | 0 | 0 | 0 | 0 FOLR1     |
| 225262_at    | -0,275687 | 1,21 | 0,00345439 | 0,0595502 | 1 | 0 | 0 | 0 FOSL2     |
| 204408_at    | -0,262735 | 1,2  | 0,00346309 | 0,059558  | 0 | 0 | 0 | 0 APEX2     |
| 226046_at    | -0,26261  | 1,2  | 0,0034604  | 0,059558  | 0 | 0 | 0 | 0 MAPK8     |
| 210276_s_at  | -0,261038 | 1,2  | 0,00347238 | 0,0596504 | 0 | 0 | 0 | 0 TRIOBP    |
| 227239_at    | 0,262931  | 1,2  | 0,00347918 | 0,0596998 | 0 | 0 | 0 | 0 FAM126A   |
| 201428_at    | -0,281578 | 1,22 | 0,00349159 | 0,0598451 | 0 | 0 | 0 | 0 CLDN4     |
| 212153_at    | -0,265747 | 1,2  | 0,0035069  | 0,0600398 | 0 | 0 | 0 | 1 POGZ      |
| 227018_at    | -0,27244  | 1,21 | 0,00353205 | 0,0604024 | 0 | 0 | 0 | 0 DPP8      |
| 226066_at    | -0,265037 | 1,2  | 0,00353749 | 0,0604275 | 2 | 1 | 0 | 1 MITF      |
| 228935_at    | -0,269792 | 1,21 | 0,00354455 | 0,0604801 | 0 | 0 | 1 | 0 SLC4A8    |
| 213072_at    | -0,26536  | 1,2  | 0,00355499 | 0,0605902 | 0 | 0 | 0 | 0 CYHR1     |
| 223849_s_at  | -0,280115 | 1,21 | 0,00356282 | 0,0606557 | 0 | 0 | 0 | 0 MOV10     |
| 1554577_a_at | -0,319914 | 1,25 | 0,00358231 | 0,0609192 | 1 | 0 | 0 | 0 PSMD10    |
| 209228_x_at  | -0,289347 | 1,22 | 0,00359095 | 0,060998  | 0 | 0 | 0 | 0 TUSC3     |
| 203313_s_at  | -0,278353 | 1,21 | 0,0036192  | 0,0613408 | 1 | 1 | 0 | 0 TGIF1     |
| 203076_s_at  | -0,27329  | 1,21 | 0,00368527 | 0,0623216 | 3 | 0 | 0 | 1 SMAD2     |
| 221931_s_at  | 0,265393  | 1,2  | 0,00371126 | 0,0626915 | 0 | 0 | 0 | 0 SEH1L     |
| 219659_at    | -0,277405 | 1,21 | 0,00374843 | 0,063179  | 0 | 0 | 0 | 0 ATP8A2    |
| 232103_at    | 0,317676  | 1,25 | 0,00374832 | 0,063179  | 0 | 0 | 0 | 0 BPNT1     |
| 220744_s_at  | -0,273414 | 1,21 | 0,00375662 | 0,0632468 | 0 | 0 | 0 | 0 IFT122    |
| 209002_s_at  | -0,267827 | 1,2  | 0,00378446 | 0,0635749 | 0 | 0 | 0 | 0 CALCOCO1  |
| 224844_at    | 0,272406  | 1,21 | 0,00378447 | 0,0635749 | 2 | 2 | 1 | 0 SLAIN2    |
| 220368_s_at  | -0,262496 | 1,2  | 0,00380279 | 0,0638121 | 0 | 0 | 0 | 0 SMEK1     |
| 222802_at    | 0,262221  | 1,2  | 0,00383093 | 0,0640722 | 0 | 1 | 0 | 0 EDN1      |
| 216321_s_at  | 0,26938   | 1,21 | 0,00382868 | 0,0640722 | 2 | 0 | 0 | 0 NR3C1     |
| 218921_at    | -0,268676 | 1,2  | 0,00384719 | 0,0642734 | 0 | 0 | 0 | 0 SIGIRR    |
| 201700_at    | -0,263634 | 1,2  | 0,00385855 | 0,0643924 | 0 | 1 | 0 | 0 CCND3     |
| 209932_s_at  | -0,298183 | 1,23 | 0,00386285 | 0,0643936 | 0 | 0 | 0 | 0 DUT       |
| 229139_at    | 0,278909  | 1,21 | 0,00389532 | 0,0647927 | 0 | 1 | 0 | 0 JPH1      |
| 220992_s_at  | -0,257532 | 1,2  | 0,00396744 | 0,0657764 | 1 | 0 | 0 | 0 C1orf25   |
| 226679_at    | -0,258628 | 1,2  | 0,00398486 | 0,0659215 | 0 | 0 | 0 | 0 SLC26A11  |
| 227331_at    | -0,270076 | 1,21 | 0,00398189 | 0,0659215 | 0 | 0 | 0 | 0 ZNF740    |
| 225799_at    | -0,270916 | 1,21 | 0,00399109 | 0,0659528 | 0 | 0 | 0 | 0 LOC541471 |
| 228354_at    | -0,255627 | 1,19 | 0,00400015 | 0,0660306 | 0 | 0 | 0 | 1 MORN4     |
| 223202_s_at  | -0,267535 | 1,2  | 0,00401306 | 0,066172  | 0 | 0 | 0 | 0 TMEM164   |
| 213622_at    | -0,256174 | 1,19 | 0,00402292 | 0,0662137 | 0 | 0 | 0 | 0 COL9A2    |
| 212315_s_at  | -0,271997 | 1,21 | 0,0040243  | 0,0662137 | 0 | 1 | 0 | 0 NUP210    |
| 218115_at    | -0,263939 | 1,2  | 0,00405751 | 0,066688  | 0 | 0 | 0 | 0 ASF1B     |
| 214193_s_at  | 0,28771   | 1,22 | 0,0040638  | 0,0667191 | 1 | 0 | 0 | 0 C1orf107  |
| 221766_s_at  | -0,256594 | 1,19 | 0,00408691 | 0,0668448 | 3 | 0 | 1 | 1 FAM46A    |
| 232048_at    | -0,263496 | 1,2  | 0,00408904 | 0,0668448 | 0 | 2 | 0 | 0 FAM76B    |
| 213278_at    | -0,269403 | 1,21 | 0,00408159 | 0,0668448 | 1 | 1 | 2 | 0 MTMR9     |
| 225579_at    | -0,26498  | 1,2  | 0,00408557 | 0,0668448 | 0 | 1 | 0 | 0 PQLC3     |
| 209099_x_at  | -0,262773 | 1,2  | 0,00410413 | 0,0670194 | 0 | 0 | 0 | 0 JAG1      |
| 202718_at    | -0,277366 | 1,21 | 0,00411599 | 0,0670691 | 0 | 0 | 0 | 0 IGFBP2    |
| 210597_x_at  | -0,264794 | 1,2  | 0,00411388 | 0,0670691 | 0 | 0 | 0 | 0 PRB1      |
| 241715_x_at  | -0,260763 | 1,2  | 0,00412505 | 0,0671447 | 0 | 0 | 0 | 0 ACPT      |
| 1438_at      | -0,274202 | 1,21 | 0,0041313  | 0,0671746 | 0 | 0 | 0 | 0 EPHB3     |
| 227029_at    | -0,276526 | 1,21 | 0,00413895 | 0,067227  | 1 | 0 | 1 | 0 FAM177A1  |
| 202169_s_at  | -0,25548  | 1,19 | 0,00416458 | 0,0675711 | 1 | 0 | 1 | 0 AASDHPPT  |
| 222835_at    | 0,266388  | 1,2  | 0,00417615 | 0,0676866 | 0 | 0 | 0 | 0 THSD4     |
| 221689_s_at  | -0,279321 | 1,21 | 0,00422502 | 0,0684058 | 0 | 0 | 0 | 0 PIGP      |
| 201298_s_at  | -0,267659 | 1,2  | 0,00423607 | 0,0685117 | 0 | 0 | 1 | 0 MOBKL1B   |
| 1553679_s_at | -0,269362 | 1,21 | 0,00428489 | 0,0690808 | 0 | 1 | 0 | 0 VKORC1L1  |
| 204216_s_at  | -0,25691  | 1,19 | 0,00429544 | 0,0691776 | 1 | 2 | 0 | 0 ZC3H14    |
| 213701_at    | 0,273146  | 1,21 | 0,00431106 | 0,0693557 | 0 | 0 | 0 | 0 C12orf29  |
| 211934_x_at  | -0,277159 | 1,21 | 0,00433142 | 0,0696095 | 0 | 0 | 0 | 0 GANAB     |

|             |           |      |            |           |   |   |   |   |          |
|-------------|-----------|------|------------|-----------|---|---|---|---|----------|
| 223315_at   | -0,254999 | 1,19 | 0,0043362  | 0,0696127 | 0 | 0 | 0 | 0 | NTN4     |
| 1569300_at  | 0,257231  | 1,2  | 0,00434533 | 0,069679  | 0 | 1 | 0 | 0 | MFAP3L   |
| 212846_at   | 0,272596  | 1,21 | 0,00435048 | 0,069679  | 0 | 0 | 0 | 0 | RRP1B    |
| 213401_s_at | 0,26911   | 1,21 | 0,00435408 | 0,069679  | 0 | 0 | 0 | 0 | TBL1X    |
| 226508_at   | 0,266374  | 1,2  | 0,00439036 | 0,0701857 | 0 | 1 | 0 | 0 | PHC3     |
| 222395_s_at | -0,323471 | 1,25 | 0,00440162 | 0,0702919 | 1 | 0 | 0 | 0 | UBE2Z    |
| 222108_at   | -0,266472 | 1,2  | 0,00444056 | 0,0706909 | 0 | 1 | 1 | 0 | AMIGO2   |
| 225898_at   | -0,266167 | 1,2  | 0,00443705 | 0,0706909 | 0 | 0 | 0 | 0 | WDR54    |
| 210150_s_at | -0,256713 | 1,19 | 0,00445289 | 0,0707391 | 0 | 0 | 0 | 0 | LAMA5    |
| 212007_at   | 0,447388  | 1,36 | 0,00444858 | 0,0707391 | 0 | 0 | 0 | 0 | UBXN4    |
| 226965_at   | -0,270533 | 1,21 | 0,00452064 | 0,0717403 | 0 | 1 | 0 | 0 | FAM116A  |
| 227361_at   | 0,263396  | 1,2  | 0,00453584 | 0,0718316 | 0 | 0 | 0 | 0 | HS3ST3B1 |
| 225178_at   | 0,25725   | 1,2  | 0,00453301 | 0,0718316 | 1 | 0 | 1 | 0 | TTC14    |
| 221452_s_at | -0,277387 | 1,21 | 0,00454301 | 0,0718704 | 0 | 0 | 0 | 0 | TMEM14B  |
| 217988_at   | -0,262623 | 1,2  | 0,00456223 | 0,0720245 | 0 | 0 | 0 | 0 | CCNB1IP1 |
| 209467_s_at | -0,263623 | 1,2  | 0,00455842 | 0,0720245 | 0 | 0 | 0 | 0 | MKNK1    |
| 202540_s_at | -0,253101 | 1,19 | 0,00456699 | 0,0720248 | 0 | 1 | 0 | 0 | HMGCR    |
| 220755_s_at | -0,2767   | 1,21 | 0,00460697 | 0,0723231 | 0 | 0 | 0 | 0 | C6orf48  |
| 205931_s_at | 0,255155  | 1,19 | 0,0046005  | 0,0723231 | 1 | 0 | 0 | 0 | CREB5    |
| 230206_at   | 0,293237  | 1,23 | 0,00460703 | 0,0723231 | 0 | 0 | 0 | 0 | DOCK5    |
| 244264_at   | 0,29155   | 1,22 | 0,00460414 | 0,0723231 | 0 | 0 | 0 | 0 | KLRG2    |
| 210191_s_at | -0,259447 | 1,2  | 0,00460969 | 0,0723231 | 0 | 0 | 1 | 0 | PHTF1    |
| 216905_s_at | -0,257158 | 1,2  | 0,00464556 | 0,0727357 | 0 | 0 | 0 | 0 | ST14     |
| 218364_at   | -0,253167 | 1,19 | 0,00465547 | 0,0728159 | 0 | 0 | 1 | 0 | LRRFIP2  |
| 212947_at   | -0,254084 | 1,19 | 0,00470135 | 0,0733826 | 0 | 0 | 0 | 0 | SLC9A8   |
| 235742_at   | -0,276996 | 1,21 | 0,00472296 | 0,0736405 | 0 | 0 | 0 | 0 | RHOC     |
| 216555_at   | 0,261581  | 1,2  | 0,00473924 | 0,0737468 | 0 | 1 | 0 | 0 | C22orf30 |
| 221972_s_at | -0,27674  | 1,21 | 0,00476138 | 0,0738645 | 0 | 0 | 0 | 0 | SDF4     |
| 228181_at   | -0,259191 | 1,2  | 0,00475257 | 0,0738645 | 0 | 0 | 0 | 0 | SLC30A1  |
| 238480_at   | 0,256966  | 1,19 | 0,00475972 | 0,0738645 | 0 | 0 | 0 | 0 | TTC39C   |
| 221764_at   | -0,272834 | 1,21 | 0,00476873 | 0,0739032 | 0 | 0 | 0 | 0 | C19orf22 |
| 226837_at   | -0,255352 | 1,19 | 0,00478073 | 0,0740137 | 3 | 0 | 1 | 0 | SPRED1   |
| 230532_at   | 0,262169  | 1,2  | 0,00479968 | 0,0742314 | 0 | 0 | 0 | 0 | CXorf38  |
| 225061_at   | 0,252718  | 1,19 | 0,00481382 | 0,0743428 | 2 | 1 | 0 | 0 | DNAJA4   |
| 203515_s_at | -0,260788 | 1,2  | 0,00481666 | 0,0743428 | 0 | 0 | 0 | 0 | PMVK     |
| 218931_at   | -0,257318 | 1,2  | 0,00487071 | 0,0751009 | 0 | 0 | 0 | 0 | RAB17    |
| 212519_at   | -0,257689 | 1,2  | 0,00488391 | 0,0752281 | 1 | 0 | 0 | 0 | UBE2E1   |
| 217784_at   | -0,263045 | 1,2  | 0,00492197 | 0,0757375 | 0 | 0 | 0 | 0 | YKT6     |
| 213523_at   | -0,259567 | 1,2  | 0,00493532 | 0,0758663 | 1 | 0 | 0 | 0 | CCNE1    |
| 1553974_at  | -0,253985 | 1,19 | 0,00495277 | 0,0759808 | 0 | 0 | 0 | 0 | C22orf39 |
| 216836_s_at | -0,258381 | 1,2  | 0,00498025 | 0,0762913 | 0 | 0 | 0 | 0 | ERBB2    |
| 213005_s_at | 0,252677  | 1,19 | 0,00498305 | 0,0762913 | 0 | 0 | 0 | 0 | KANK1    |
| 210010_s_at | -0,30736  | 1,24 | 0,00498946 | 0,0763126 | 0 | 0 | 0 | 0 | SLC25A1  |
| 211944_at   | -0,28683  | 1,22 | 0,00503411 | 0,0768487 | 1 | 0 | 0 | 0 | BAT2D1   |
| 227396_at   | -0,261493 | 1,2  | 0,00503462 | 0,0768487 | 4 | 1 | 0 | 0 | PTPRJ    |
| 235798_at   | -0,250148 | 1,19 | 0,00504604 | 0,0768687 | 0 | 1 | 1 | 0 | TMEM170B |
| 219330_at   | -0,262853 | 1,2  | 0,00504363 | 0,0768687 | 3 | 2 | 0 | 0 | VANGL1   |
| 203469_s_at | -0,25686  | 1,19 | 0,00508974 | 0,0772249 | 0 | 0 | 0 | 0 | CDK10    |
| 205516_x_at | -0,252361 | 1,19 | 0,00507965 | 0,0772249 | 0 | 0 | 0 | 0 | CIZ1     |
| 209858_x_at | -0,252646 | 1,19 | 0,00508809 | 0,0772249 | 0 | 0 | 1 | 0 | MPPE1    |
| 213376_at   | -0,254619 | 1,19 | 0,00508622 | 0,0772249 | 0 | 0 | 0 | 0 | ZBTB1    |
| 225082_at   | -0,258189 | 1,2  | 0,00511207 | 0,0774864 | 0 | 0 | 0 | 0 | CPSF3    |
| 208091_s_at | -0,260551 | 1,2  | 0,00512836 | 0,0776559 | 1 | 0 | 0 | 0 | ECOP     |
| 213194_at   | 0,256377  | 1,19 | 0,00513989 | 0,077753  | 0 | 0 | 0 | 0 | ROBO1    |
| 200621_at   | -0,249634 | 1,19 | 0,00515897 | 0,077964  | 0 | 0 | 0 | 0 | CSRP1    |
| 212503_s_at | -0,257679 | 1,2  | 0,00517279 | 0,0780784 | 0 | 0 | 0 | 0 | DIP2C    |
| 229204_at   | 0,284707  | 1,22 | 0,00517681 | 0,0780784 | 0 | 0 | 0 | 0 | HP1BP3   |
| 218085_at   | -0,277276 | 1,21 | 0,00518402 | 0,0781097 | 1 | 1 | 0 | 0 | CHMP5    |
| 216064_s_at | -0,280544 | 1,21 | 0,00519906 | 0,0782174 | 1 | 0 | 0 | 0 | AGA      |
| 222227_at   | 0,332864  | 1,26 | 0,00520146 | 0,0782174 | 0 | 0 | 0 | 0 | GPBR     |
| 201179_s_at | -0,274435 | 1,21 | 0,00522899 | 0,0785536 | 2 | 1 | 0 | 0 | GNAI3    |
| 207630_s_at | -0,260527 | 1,2  | 0,00525919 | 0,0788165 | 1 | 0 | 0 | 0 | CREM     |
| 208993_s_at | 0,345255  | 1,27 | 0,00525765 | 0,0788165 | 0 | 0 | 0 | 0 | PPIG     |
| 212638_s_at | 0,26363   | 1,2  | 0,00526204 | 0,0788165 | 0 | 0 | 0 | 0 | WWP1     |
| 223535_at   | 0,294935  | 1,23 | 0,00526902 | 0,0788434 | 0 | 0 | 0 | 0 | NUDT12   |
| 213476_x_at | -0,261155 | 1,2  | 0,00528904 | 0,0790652 | 0 | 0 | 0 | 0 | TUBB3    |
| 201005_at   | -0,264668 | 1,2  | 0,0053027  | 0,0790777 | 0 | 0 | 0 | 0 | CD9      |
| 214826_at   | 0,249856  | 1,19 | 0,00529998 | 0,0790777 | 0 | 0 | 0 | 0 | PDE12    |
| 225162_at   | 0,258756  | 1,2  | 0,00530548 | 0,0790777 | 0 | 0 | 0 | 0 | SH3D19   |
| 221654_s_at | -0,260035 | 1,2  | 0,00533995 | 0,0794357 | 0 | 0 | 0 | 0 | USP3     |

|             |           |      |            |           |   |   |   |             |
|-------------|-----------|------|------------|-----------|---|---|---|-------------|
| 201786_s_at | -0,256653 | 1,19 | 0,00537907 | 0,0799394 | 1 | 0 | 1 | 0 ADAR      |
| 202708_s_at | -0,251525 | 1,19 | 0,00539615 | 0,0801149 | 1 | 0 | 0 | 0 HIST2H2BE |
| 200959_at   | -0,277716 | 1,21 | 0,00541789 | 0,0803592 | 0 | 0 | 0 | 0 FUS       |
| 226195_at   | -0,273323 | 1,21 | 0,00542397 | 0,080371  | 0 | 0 | 0 | 0 C14orf179 |
| 216266_s_at | -0,252599 | 1,19 | 0,00550534 | 0,081181  | 1 | 0 | 0 | 0 ARFGEF1   |
| 219283_at   | -0,27106  | 1,21 | 0,00550025 | 0,081181  | 0 | 0 | 0 | 0 C1GALT1C1 |
| 228688_at   | 0,255353  | 1,19 | 0,00548633 | 0,081181  | 0 | 0 | 0 | 0 LOC283922 |
| 208322_s_at | 0,253107  | 1,19 | 0,00549662 | 0,081181  | 0 | 0 | 0 | 0 ST3GAL1   |
| 215532_x_at | 0,276014  | 1,21 | 0,00549351 | 0,081181  | 1 | 0 | 0 | 0 ZNF492    |
| 221064_s_at | -0,246157 | 1,19 | 0,00551489 | 0,081243  | 2 | 0 | 1 | 0 UNKL      |
| 238550_at   | 0,250053  | 1,19 | 0,00554858 | 0,0815812 | 1 | 0 | 0 | 0 RUFY2     |
| 218639_s_at | -0,248009 | 1,19 | 0,00554329 | 0,0815812 | 1 | 1 | 1 | 0 ZXDC      |
| 242414_at   | -0,26784  | 1,2  | 0,00555815 | 0,0816431 | 0 | 0 | 0 | 0 QPRT      |
| 216202_s_at | -0,276314 | 1,21 | 0,00556503 | 0,0816652 | 2 | 0 | 0 | 0 SPTLC2    |
| 208152_s_at | 0,252022  | 1,19 | 0,0055722  | 0,0816916 | 0 | 0 | 0 | 0 DDX21     |
| 226431_at   | -0,248268 | 1,19 | 0,00558916 | 0,0818612 | 2 | 0 | 0 | 0 FAM117B   |
| 225103_at   | -0,27433  | 1,21 | 0,00563562 | 0,0824623 | 0 | 0 | 0 | 0 MRPL38    |
| 208686_s_at | -0,26067  | 1,2  | 0,00564295 | 0,0824902 | 0 | 0 | 0 | 0 BRD2      |
| 204518_s_at | -0,282908 | 1,22 | 0,00565352 | 0,0825653 | 0 | 0 | 0 | 0 PPIC      |
| 227335_at   | -0,249659 | 1,19 | 0,00567285 | 0,0827681 | 0 | 0 | 0 | 1 DIDO1     |
| 228361_at   | -0,249753 | 1,19 | 0,00570927 | 0,0830814 | 1 | 0 | 0 | 0 E2F2      |
| 219445_at   | -0,245063 | 1,19 | 0,00571072 | 0,0830814 | 0 | 0 | 0 | 2 GLTSCR1   |
| 206245_s_at | -0,258022 | 1,2  | 0,00570334 | 0,0830814 | 0 | 0 | 0 | 0 IVNS1ABP  |
| 236957_at   | 0,260997  | 1,2  | 0,00574693 | 0,0833689 | 0 | 0 | 0 | 0 CDCA2     |
| 210993_s_at | -0,254106 | 1,19 | 0,005744   | 0,0833689 | 1 | 1 | 0 | 0 SMAD1     |
| 202412_s_at | 0,36173   | 1,28 | 0,00574032 | 0,0833689 | 0 | 0 | 0 | 0 USP1      |
| 1553947_at  | -0,277294 | 1,21 | 0,00585747 | 0,0848914 | 0 | 0 | 0 | 0 EXOSC6    |
| 226680_at   | 0,26278   | 1,2  | 0,00588193 | 0,0850837 | 0 | 0 | 0 | 0 IKZF5     |
| 202372_at   | -0,252004 | 1,19 | 0,00587731 | 0,0850837 | 2 | 0 | 0 | 1 RAB3GAP2  |
| 239208_s_at | -0,258742 | 1,2  | 0,00589211 | 0,0851499 | 0 | 0 | 0 | 0 C21orf57  |
| 206451_at   | 0,275275  | 1,21 | 0,00592038 | 0,0854772 | 1 | 0 | 0 | 0 TBCCD1    |
| 210859_x_at | -0,253715 | 1,19 | 0,00594925 | 0,0858125 | 0 | 0 | 0 | 0 CLN3      |
| 201360_at   | -0,265283 | 1,2  | 0,00596681 | 0,0859029 | 0 | 0 | 0 | 0 CST3      |
| 204840_s_at | 0,281925  | 1,22 | 0,00596292 | 0,0859029 | 0 | 0 | 0 | 0 EEA1      |
| 209103_s_at | -0,259204 | 1,2  | 0,00597613 | 0,0859557 | 1 | 0 | 0 | 0 UFD1L     |
| 225549_at   | -0,250668 | 1,19 | 0,0059866  | 0,0860249 | 1 | 0 | 1 | 0 DDX6      |
| 204189_at   | -0,252034 | 1,19 | 0,00600315 | 0,0861812 | 0 | 0 | 0 | 0 RARG      |
| 200049_at   | -0,248941 | 1,19 | 0,00604499 | 0,0867    | 0 | 0 | 0 | 1 MYST2     |
| 213949_s_at | -0,24841  | 1,19 | 0,00608017 | 0,0871224 | 0 | 0 | 0 | 0 DOHH      |
| 214751_at   | 0,296204  | 1,23 | 0,00609248 | 0,0872165 | 0 | 0 | 0 | 0 ZNF468    |
| 219565_at   | -0,253947 | 1,19 | 0,00609911 | 0,0872293 | 0 | 1 | 1 | 0 CYP20A1   |
| 214494_s_at | -0,252107 | 1,19 | 0,00612198 | 0,0874741 | 0 | 0 | 0 | 0 SPG7      |
| 218229_s_at | -0,257898 | 1,2  | 0,00612834 | 0,0874828 | 0 | 0 | 0 | 1 POGK      |
| 227863_at   | -0,242027 | 1,18 | 0,00615012 | 0,0877113 | 0 | 0 | 0 | 0 CTSD      |
| 210046_s_at | -0,260613 | 1,2  | 0,0061851  | 0,0881275 | 0 | 1 | 0 | 0 IDH2      |
| 218195_at   | 0,299138  | 1,23 | 0,00619911 | 0,0881618 | 0 | 0 | 0 | 0 C6orf211  |
| 201655_s_at | -0,248964 | 1,19 | 0,00619439 | 0,0881618 | 0 | 0 | 0 | 0 HSPG2     |
| 229793_at   | -0,247737 | 1,19 | 0,00628874 | 0,0892294 | 0 | 0 | 0 | 0 ASAH2B    |
| 224097_s_at | -0,257582 | 1,2  | 0,00629178 | 0,0892294 | 1 | 1 | 0 | 0 F11R      |
| 225157_at   | -0,249847 | 1,19 | 0,00629039 | 0,0892294 | 0 | 0 | 0 | 0 MLXIP     |
| 202650_s_at | -0,242431 | 1,18 | 0,00630554 | 0,0893412 | 0 | 0 | 0 | 0 KIAA0195  |
| 224684_at   | -0,262095 | 1,2  | 0,00632565 | 0,0894595 | 0 | 0 | 0 | 0 SNX12     |
| 205287_s_at | -0,256447 | 1,19 | 0,00632352 | 0,0894595 | 0 | 0 | 0 | 0 TFAP2C    |
| 226405_s_at | -0,244539 | 1,18 | 0,00636318 | 0,089518  | 0 | 0 | 0 | 0 ARRDC1    |
| 213979_s_at | 0,28335   | 1,22 | 0,00635788 | 0,089518  | 0 | 0 | 0 | 0 CTBP1     |
| 226121_at   | -0,250265 | 1,19 | 0,00637928 | 0,089518  | 0 | 0 | 0 | 0 DHRS13    |
| 218522_s_at | -0,24284  | 1,18 | 0,00635262 | 0,089518  | 0 | 0 | 0 | 0 MAP1S     |
| 200701_at   | -0,256943 | 1,19 | 0,00638074 | 0,089518  | 0 | 0 | 0 | 0 NPC2      |
| 236703_at   | -0,250182 | 1,19 | 0,00636535 | 0,089518  | 2 | 0 | 0 | 0 NT5C2     |
| 200846_s_at | -0,267674 | 1,2  | 0,00638279 | 0,089518  | 0 | 0 | 0 | 0 PPP1CA    |
| 213082_s_at | -0,250873 | 1,19 | 0,00636179 | 0,089518  | 0 | 0 | 0 | 0 SLC35D2   |
| 212986_s_at | -0,251009 | 1,19 | 0,00637369 | 0,089518  | 0 | 0 | 1 | 0 TLK2      |
| 226921_at   | 0,259898  | 1,2  | 0,00639073 | 0,0895468 | 0 | 0 | 0 | 0 UBR1      |
| 227040_at   | -0,255051 | 1,19 | 0,00639973 | 0,0895903 | 0 | 1 | 0 | 1 NHLRC3    |
| 211609_x_at | -0,27334  | 1,21 | 0,00641412 | 0,0896607 | 0 | 0 | 0 | 0 PSMD4     |
| 1553928_at  | -0,240607 | 1,18 | 0,00642502 | 0,0896965 | 0 | 0 | 0 | 0 ELMOD2    |
| 1553990_at  | -0,2421   | 1,18 | 0,006433   | 0,0897256 | 0 | 0 | 0 | 0 C16orf79  |
| 239232_at   | 0,285957  | 1,22 | 0,00645558 | 0,0898756 | 0 | 0 | 0 | 0 MSI2      |
| 225877_at   | -0,247661 | 1,19 | 0,00645106 | 0,0898756 | 0 | 0 | 0 | 0 TYSND1    |
| 224129_s_at | -0,251887 | 1,19 | 0,00647071 | 0,0900038 | 0 | 1 | 0 | 0 DPY30     |

|              |           |      |            |           |   |   |   |             |
|--------------|-----------|------|------------|-----------|---|---|---|-------------|
| 218988_at    | -0,245134 | 1,19 | 0,00648522 | 0,0901232 | 0 | 1 | 0 | 0 SLC35E3   |
| 209772_s_at  | -0,258582 | 1,2  | 0,00649685 | 0,0902024 | 1 | 1 | 0 | 0 CD24      |
| 211975_at    | -0,259615 | 1,2  | 0,00652271 | 0,0903964 | 0 | 0 | 0 | 0 ARFGAP2   |
| 208932_at    | -0,269466 | 1,21 | 0,00651892 | 0,0903964 | 0 | 0 | 0 | 0 PPP4C     |
| 200898_s_at  | -0,246757 | 1,19 | 0,00653421 | 0,0904424 | 1 | 0 | 0 | 0 MGEA5     |
| 225509_at    | -0,248291 | 1,19 | 0,00653794 | 0,0904424 | 0 | 1 | 1 | 0 SAP30L    |
| 205190_at    | 0,255152  | 1,19 | 0,0065543  | 0,0905041 | 2 | 0 | 0 | 0 PLS1      |
| 228545_at    | -0,245652 | 1,19 | 0,00655011 | 0,0905041 | 4 | 2 | 0 | 1 ZNF148    |
| 206696_at    | -0,246286 | 1,19 | 0,006574   | 0,0905799 | 0 | 0 | 0 | 0 GPR143    |
| 209581_at    | -0,267569 | 1,2  | 0,00657766 | 0,0905799 | 0 | 0 | 0 | 0 PLA2G16   |
| 203147_s_at  | 0,261352  | 1,2  | 0,006573   | 0,0905799 | 0 | 0 | 0 | 0 TRIM14    |
| 201989_s_at  | 0,245021  | 1,19 | 0,00658745 | 0,0906325 | 1 | 0 | 0 | 0 CREBL2    |
| 227283_at    | -0,243286 | 1,18 | 0,00660249 | 0,0906754 | 0 | 0 | 1 | 0 EFR3B     |
| 216032_s_at  | -0,279374 | 1,21 | 0,00660214 | 0,0906754 | 0 | 0 | 0 | 0 ERGIC3    |
| 224861_at    | -0,241515 | 1,18 | 0,00663006 | 0,0909719 | 1 | 0 | 0 | 0 GNAQ      |
| 213604_at    | 0,24623   | 1,19 | 0,00668262 | 0,0916104 | 0 | 0 | 0 | 0 TCEB3     |
| 223389_s_at  | -0,241265 | 1,18 | 0,00670828 | 0,0918793 | 0 | 0 | 0 | 0 ZNF581    |
| 217223_s_at  | -0,253208 | 1,19 | 0,0067535  | 0,0922492 | 0 | 0 | 0 | 0 BCR       |
| 205930_at    | -0,242664 | 1,18 | 0,00674977 | 0,0922492 | 0 | 1 | 0 | 0 GTF2E1    |
| 209898_x_at  | -0,255301 | 1,19 | 0,0067456  | 0,0922492 | 1 | 0 | 0 | 0 ITS2N     |
| 206234_s_at  | -0,244717 | 1,18 | 0,00677715 | 0,0924892 | 0 | 0 | 0 | 0 MMP17     |
| 201439_at    | -0,240787 | 1,18 | 0,00682379 | 0,0930422 | 0 | 0 | 0 | 0 GBF1      |
| 202779_s_at  | -0,288702 | 1,22 | 0,00686102 | 0,093466  | 0 | 0 | 0 | 0 UBE2S     |
| 242304_at    | -0,23997  | 1,18 | 0,00690281 | 0,0939512 | 0 | 0 | 0 | 0 WIBG      |
| 210028_s_at  | -0,239355 | 1,18 | 0,00694428 | 0,094268  | 0 | 1 | 0 | 0 ORC3L     |
| 218960_at    | -0,239323 | 1,18 | 0,00694469 | 0,094268  | 2 | 1 | 0 | 0 TMPRSS4   |
| 226481_at    | 0,246451  | 1,19 | 0,00700063 | 0,0949425 | 0 | 0 | 0 | 0 VPRBP     |
| 201954_at    | -0,295547 | 1,23 | 0,00703313 | 0,0952517 | 0 | 0 | 0 | 0 ARPC1B    |
| 210975_x_at  | -0,244945 | 1,19 | 0,00704849 | 0,0952517 | 0 | 0 | 0 | 0 FASTK     |
| 201188_s_at  | -0,242538 | 1,18 | 0,00704639 | 0,0952517 | 0 | 0 | 0 | 0 ITPR3     |
| 230630_at    | 0,296601  | 1,23 | 0,00706135 | 0,0952562 | 0 | 0 | 0 | 0 AK3L1     |
| 204034_at    | -0,240255 | 1,18 | 0,00706132 | 0,0952562 | 0 | 0 | 0 | 0 ETHE1     |
| 219420_s_at  | 0,25578   | 1,19 | 0,00708364 | 0,0953031 | 0 | 0 | 0 | 0 C1orf163  |
| 231836_at    | -0,249891 | 1,19 | 0,00707854 | 0,0953031 | 0 | 0 | 0 | 0 HKR1      |
| 218806_s_at  | -0,243084 | 1,18 | 0,00707736 | 0,0953031 | 0 | 0 | 0 | 0 VAV3      |
| 225534_at    | -0,265483 | 1,2  | 0,00711019 | 0,0954478 | 0 | 0 | 0 | 0 C8orf40   |
| 212917_x_at  | 0,267007  | 1,2  | 0,0071019  | 0,0954478 | 0 | 0 | 0 | 0 RECQL     |
| 226335_at    | -0,253024 | 1,19 | 0,00711951 | 0,0954478 | 1 | 0 | 0 | 0 RPS6KA3   |
| 223376_s_at  | -0,241585 | 1,18 | 0,00713514 | 0,095468  | 0 | 0 | 0 | 0 BRI3      |
| 209530_at    | -0,239917 | 1,18 | 0,00712887 | 0,095468  | 0 | 0 | 0 | 0 CACNB3    |
| 227350_at    | -0,270431 | 1,21 | 0,00713985 | 0,095468  | 0 | 0 | 0 | 0 HELLS     |
| 221711_s_at  | -0,262719 | 1,2  | 0,00715134 | 0,0954759 | 0 | 0 | 0 | 0 C19orf62  |
| 209132_s_at  | -0,263945 | 1,2  | 0,00715626 | 0,0954759 | 0 | 0 | 0 | 0 COMMD4    |
| 224413_s_at  | -0,247203 | 1,19 | 0,00715936 | 0,0954759 | 1 | 0 | 0 | 1 TM2D2     |
| 221728_x_at  | 0,245738  | 1,19 | 0,00716556 | 0,0954759 | 6 | 1 | 3 | 1 XIST      |
| 209712_at    | -0,244632 | 1,18 | 0,00718117 | 0,0956001 | 0 | 0 | 0 | 0 SLC35D1   |
| 208829_at    | -0,250009 | 1,19 | 0,00719528 | 0,0957041 | 0 | 0 | 0 | 0 TAPBP     |
| 243683_at    | 0,305492  | 1,24 | 0,00720384 | 0,0957342 | 0 | 0 | 0 | 0 MORF4L2   |
| 232154_at    | -0,239148 | 1,18 | 0,00725694 | 0,0963557 | 0 | 0 | 0 | 0 LOC199800 |
| 218421_at    | -0,244186 | 1,18 | 0,00726957 | 0,0964392 | 2 | 0 | 0 | 0 CERK      |
| 1555274_a_at | -0,245669 | 1,19 | 0,00727976 | 0,0964901 | 1 | 0 | 0 | 1 SELI      |
| 208890_s_at  | -0,252927 | 1,19 | 0,00734904 | 0,0973236 | 0 | 0 | 0 | 0 PLXNB2    |
| 227341_at    | -0,239619 | 1,18 | 0,00742912 | 0,098213  | 0 | 0 | 0 | 0 BEND7     |
| 226553_at    | -0,238806 | 1,18 | 0,00742544 | 0,098213  | 0 | 0 | 0 | 0 TMPRSS2   |
| 219172_at    | -0,239383 | 1,18 | 0,00744441 | 0,0983296 | 0 | 0 | 0 | 0 UBTD1     |
| 238631_at    | 0,240873  | 1,18 | 0,00750153 | 0,0989121 | 0 | 0 | 0 | 0 ZNF140    |
| 205588_s_at  | -0,240417 | 1,18 | 0,00751506 | 0,0990047 | 0 | 0 | 0 | 0 FGFR1OP   |
| 218500_at    | -0,238744 | 1,18 | 0,00752813 | 0,0990911 | 0 | 0 | 0 | 0 C8orf55   |
| 201582_at    | 0,248559  | 1,19 | 0,00754194 | 0,0991869 | 0 | 0 | 0 | 0 SEC23B    |
| 224922_at    | 0,240703  | 1,18 | 0,00755306 | 0,0992474 | 1 | 0 | 0 | 0 CSNK2A2   |
