# Supplementary material
Source: PubMed Central journal article supplement (PMC3243595)
Supplement: emboj2011331s3.pdf [file emboj2011331s3.pdf]

Frankel et al. Supplementary Table II

| <b>GO.ID</b>  | <b>Molecular Function</b>                                | <b>P-value</b> |
|---------------|----------------------------------------------------------|----------------|
| 1 GO:0008270  | zinc ion binding                                         | 0              |
| 2 GO:0005524  | ATP binding                                              | 0              |
| 3 GO:0005515  | protein binding                                          | 0              |
| 4 GO:0003700  | transcription factor activity                            | 0              |
| 5 GO:0005509  | calcium ion binding                                      | 8.3e-30        |
| 6 GO:0003677  | DNA binding                                              | 1.7e-25        |
| 7 GO:0043565  | sequence-specific DNA binding                            | 9.6e-23        |
| 8 GO:0003779  | actin binding                                            | 6.9e-21        |
| 9 GO:0003723  | RNA binding                                              | 1.2e-20        |
| 10 GO:0004674 | protein serine/threonine kinase activity                 | 5.1e-20        |
| 11 GO:0000287 | magnesium ion binding                                    | 2.0e-16        |
| 12 GO:0042802 | identical protein binding                                | 5.9e-16        |
| 13 GO:0003702 | RNA polymerase II transcription factor activity          | 2.2e-12        |
| 14 GO:0042803 | protein homodimerization activity                        | 3.9e-12        |
| 15 GO:0005506 | iron ion binding                                         | 6.2e-12        |
| 16 GO:0005198 | structural molecule activity                             | 6.7e-12        |
| 17 GO:0003713 | transcription coactivator activity                       | 8.5e-11        |
| 18 GO:0005525 | GTP binding                                              | 1.3e-10        |
| 19 GO:0009055 | electron carrier activity                                | 3.2e-10        |
| 20 GO:0003924 | GTPase activity                                          | 5.8e-10        |
| 21 GO:0030145 | manganese ion binding                                    | 1.8e-09        |
| 22 GO:0003704 | specific RNA polymerase II transcription factor activity | 3.3e-09        |
| 23 GO:0004221 | ubiquitin thiolesterase activity                         | 1.6e-08        |
| 24 GO:0003735 | structural constituent of ribosome                       | 1.7e-08        |
| 25 GO:0004930 | G-protein coupled receptor activity                      | 1.9e-08        |
